# Supplementary material for: Identification of the Plant Family Caryophyllaceae in Korea Using DNA Barcoding
Source: MDPI journal article supplement (doi:10.3390/plants12102060), 2023-05-22

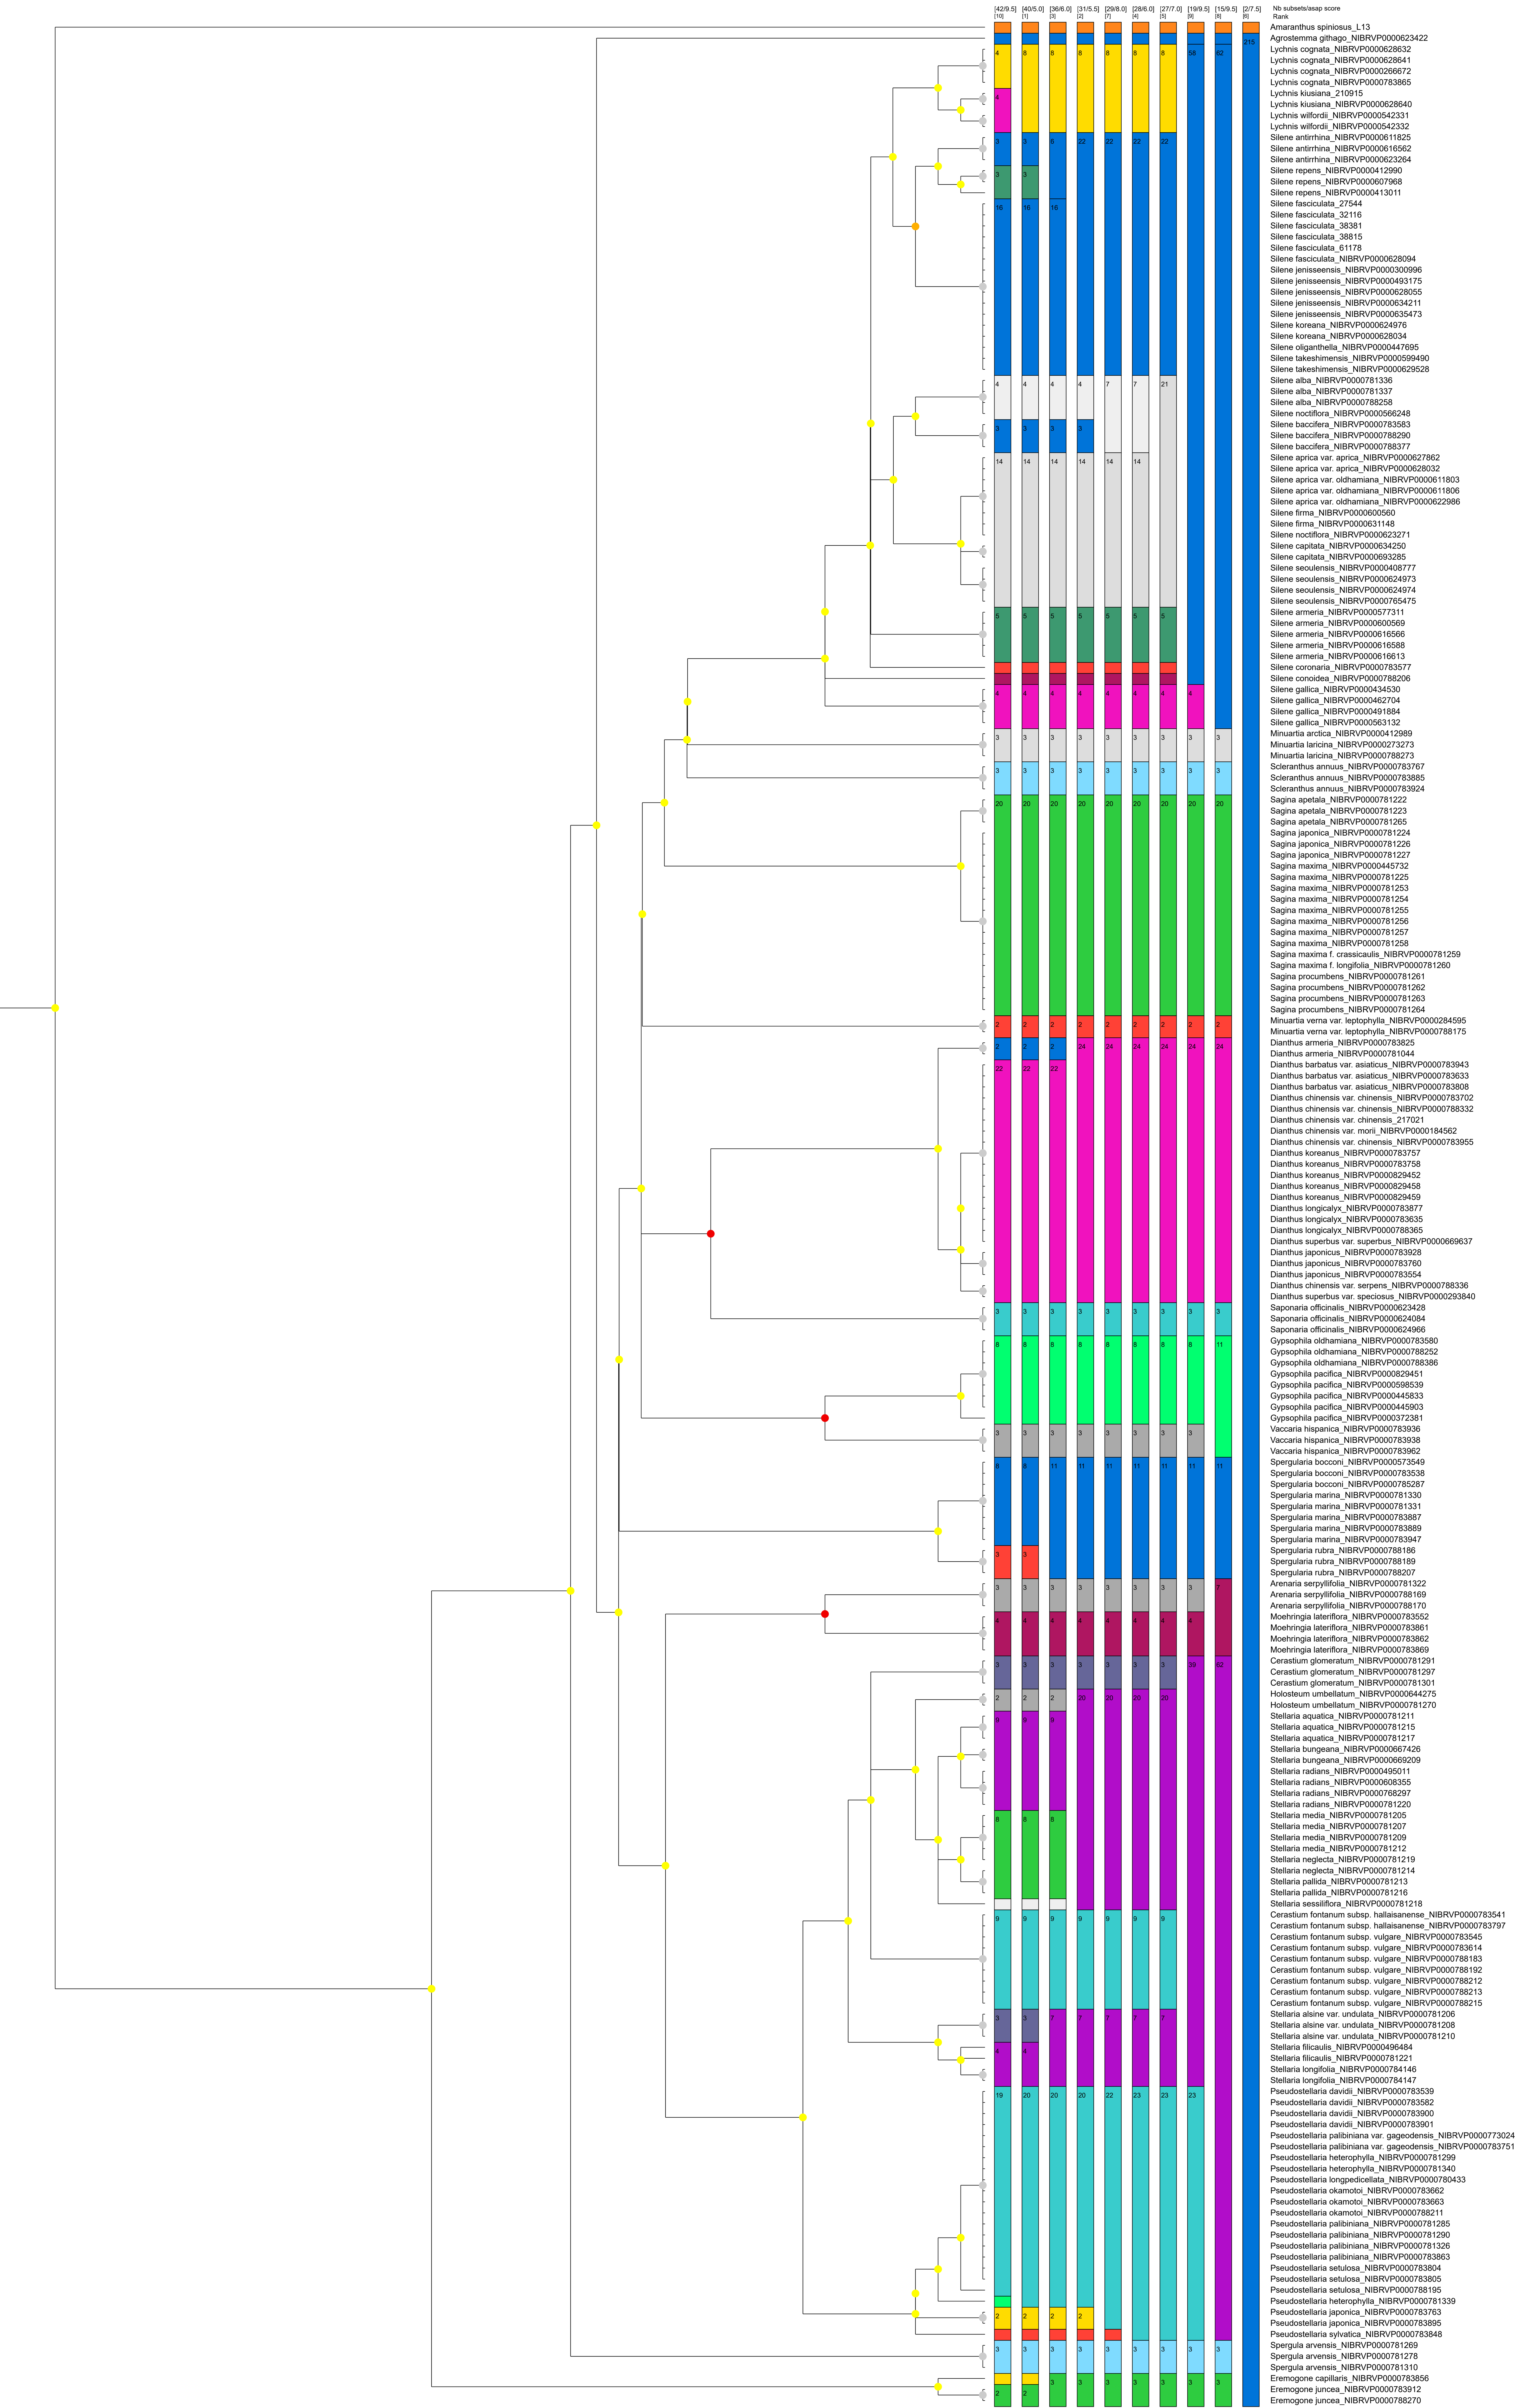



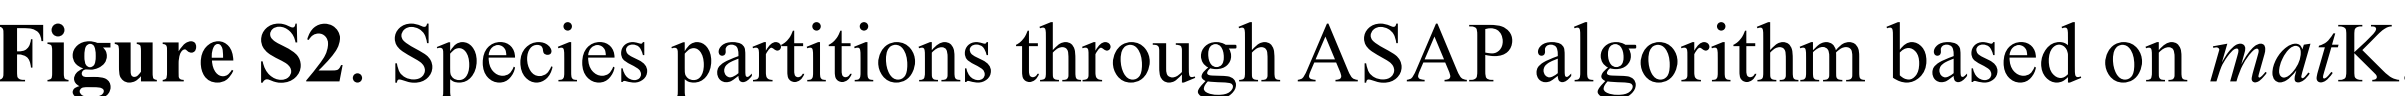



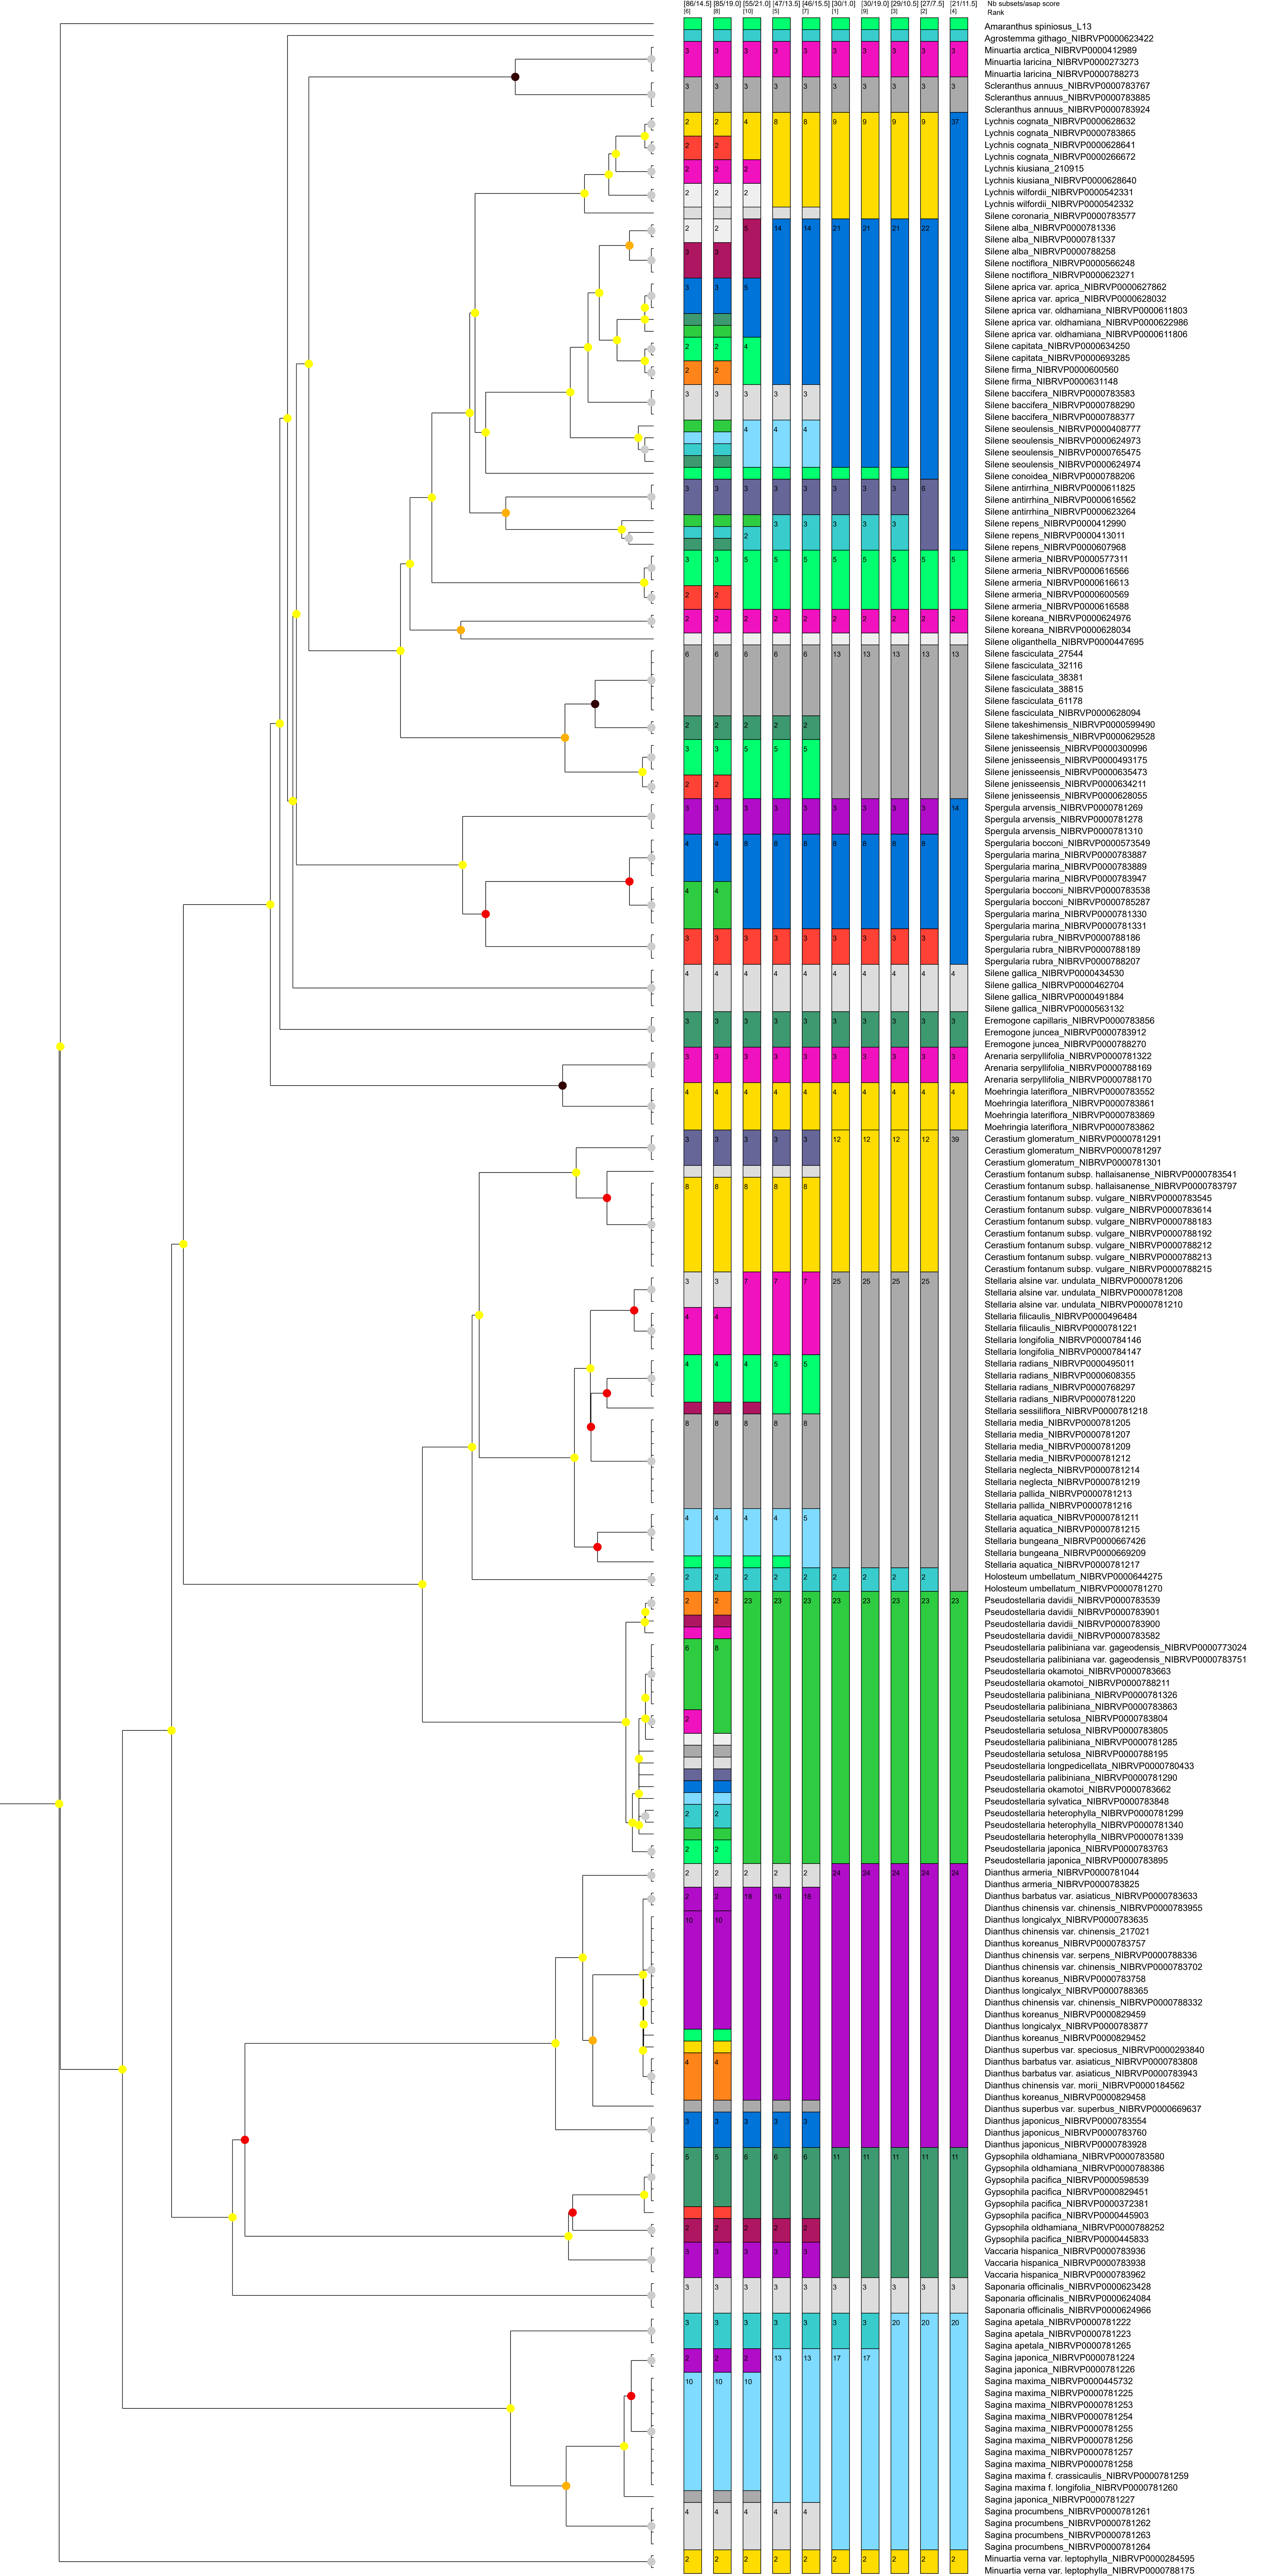



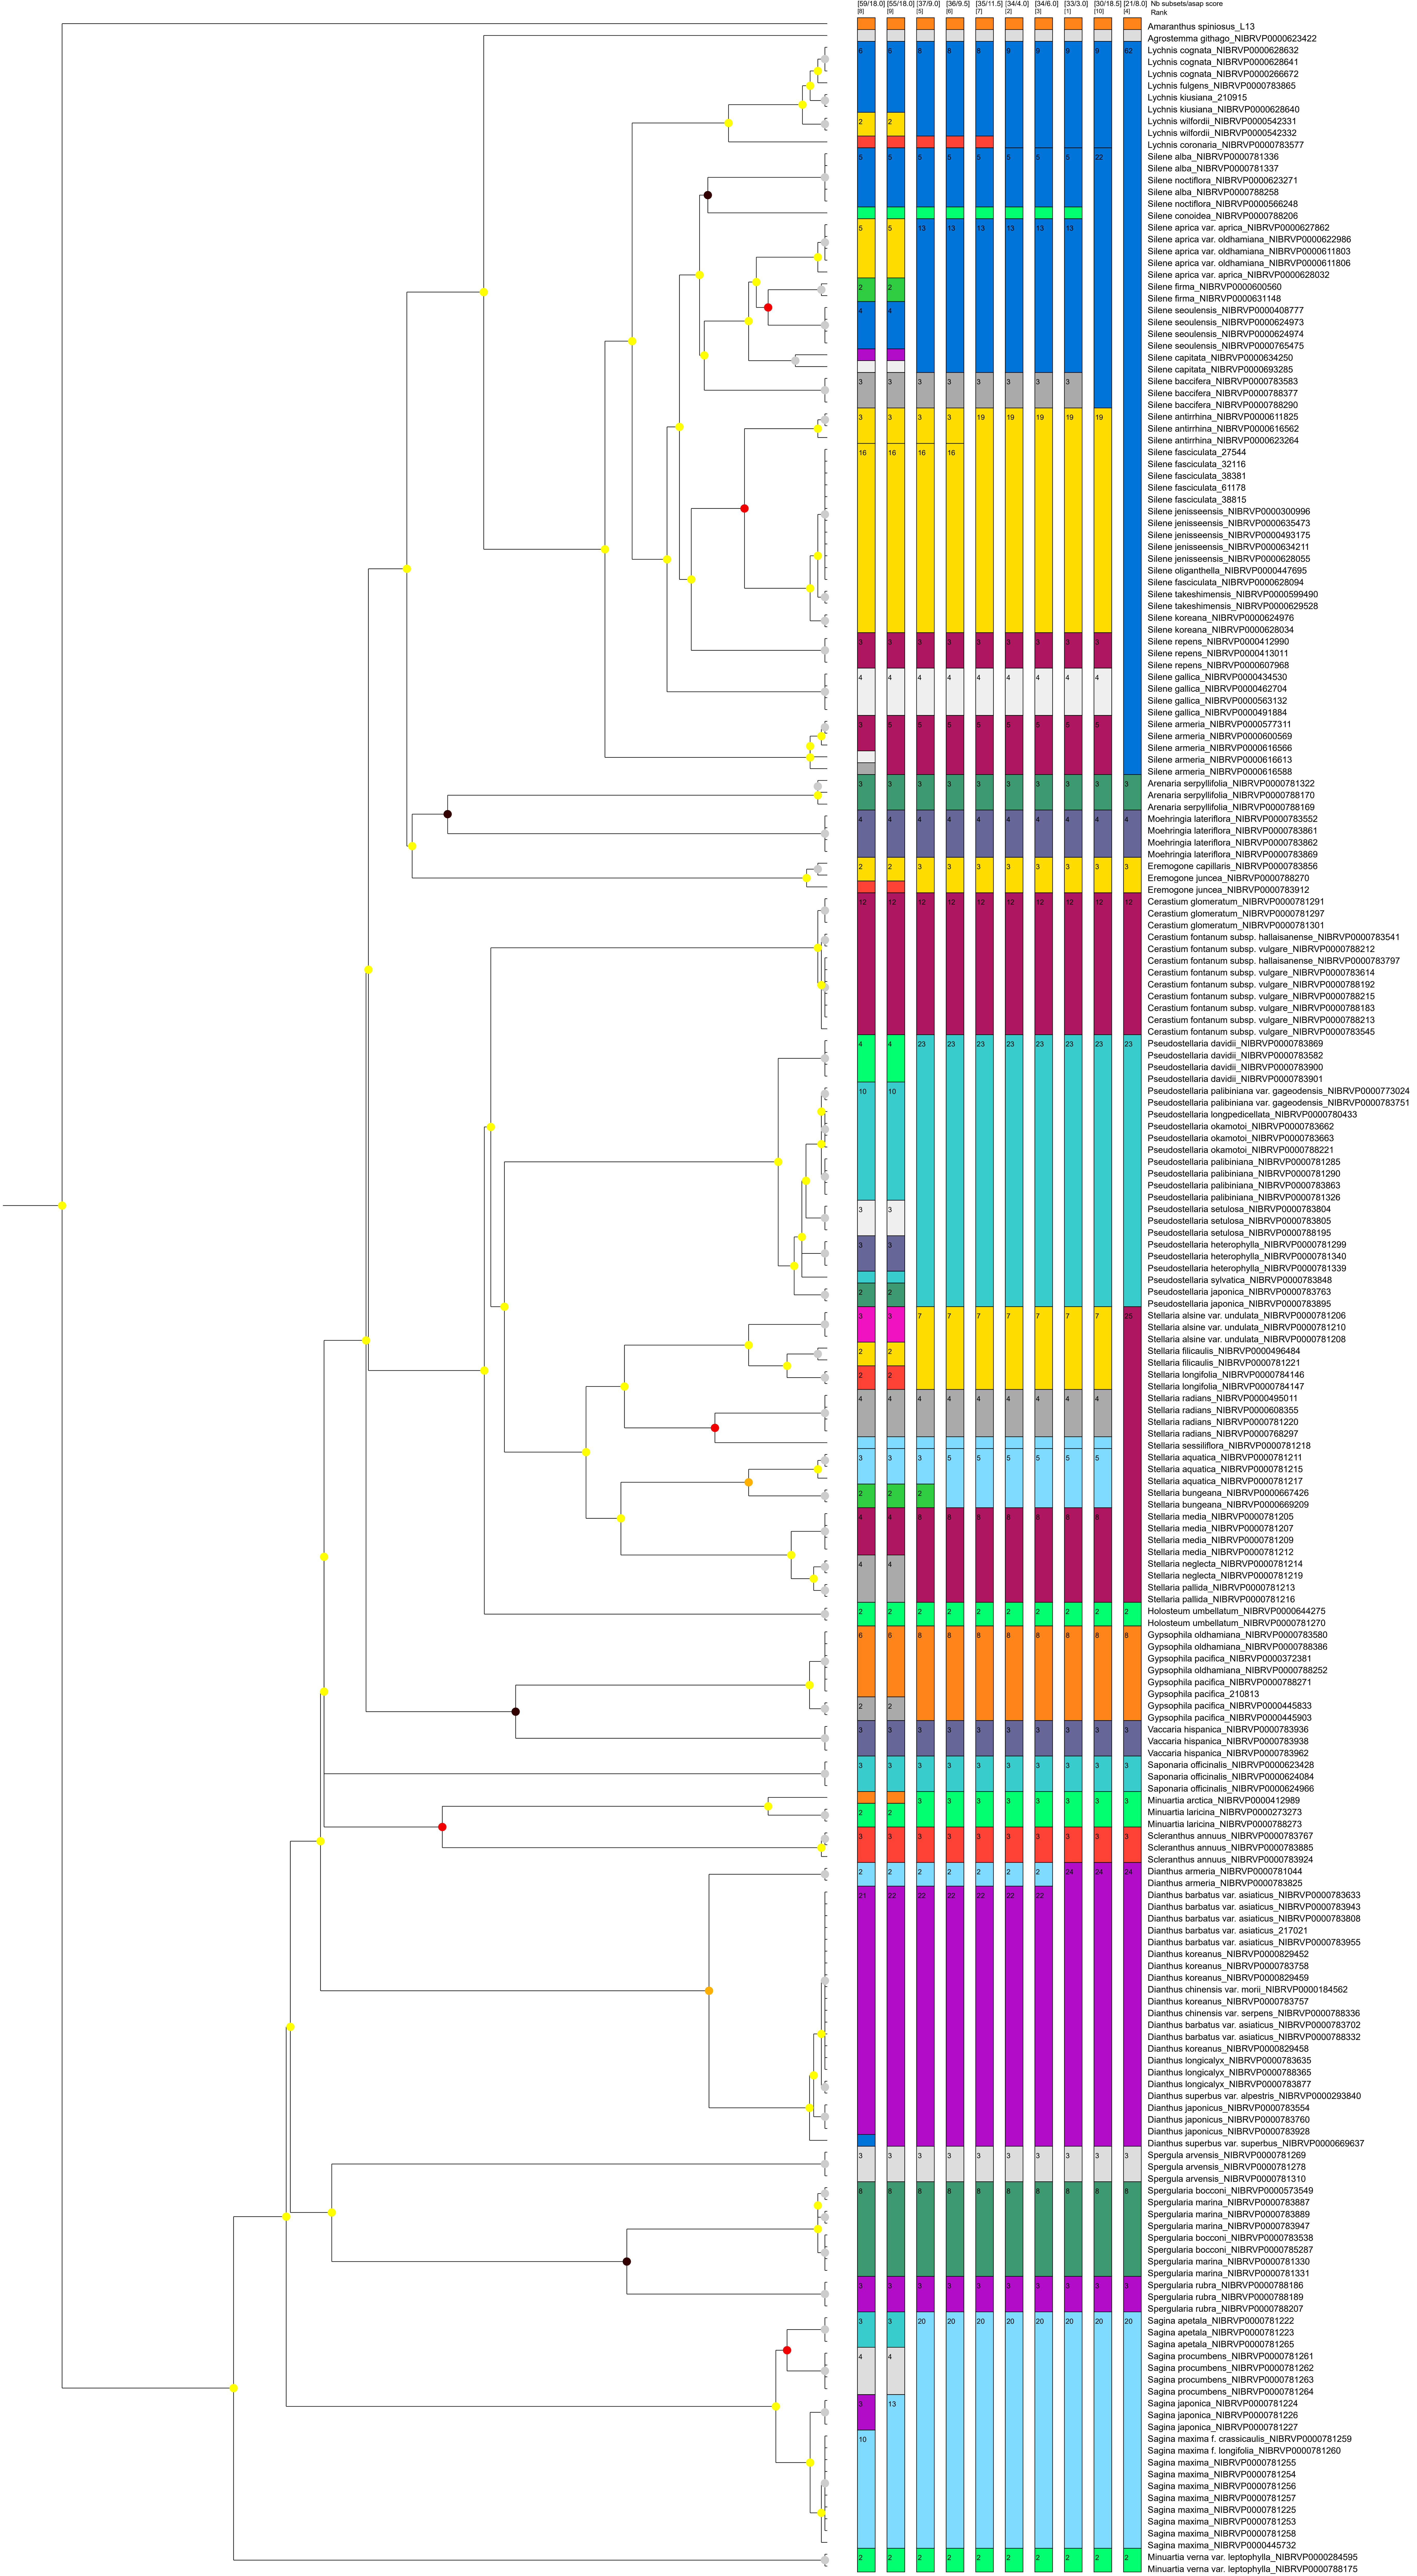



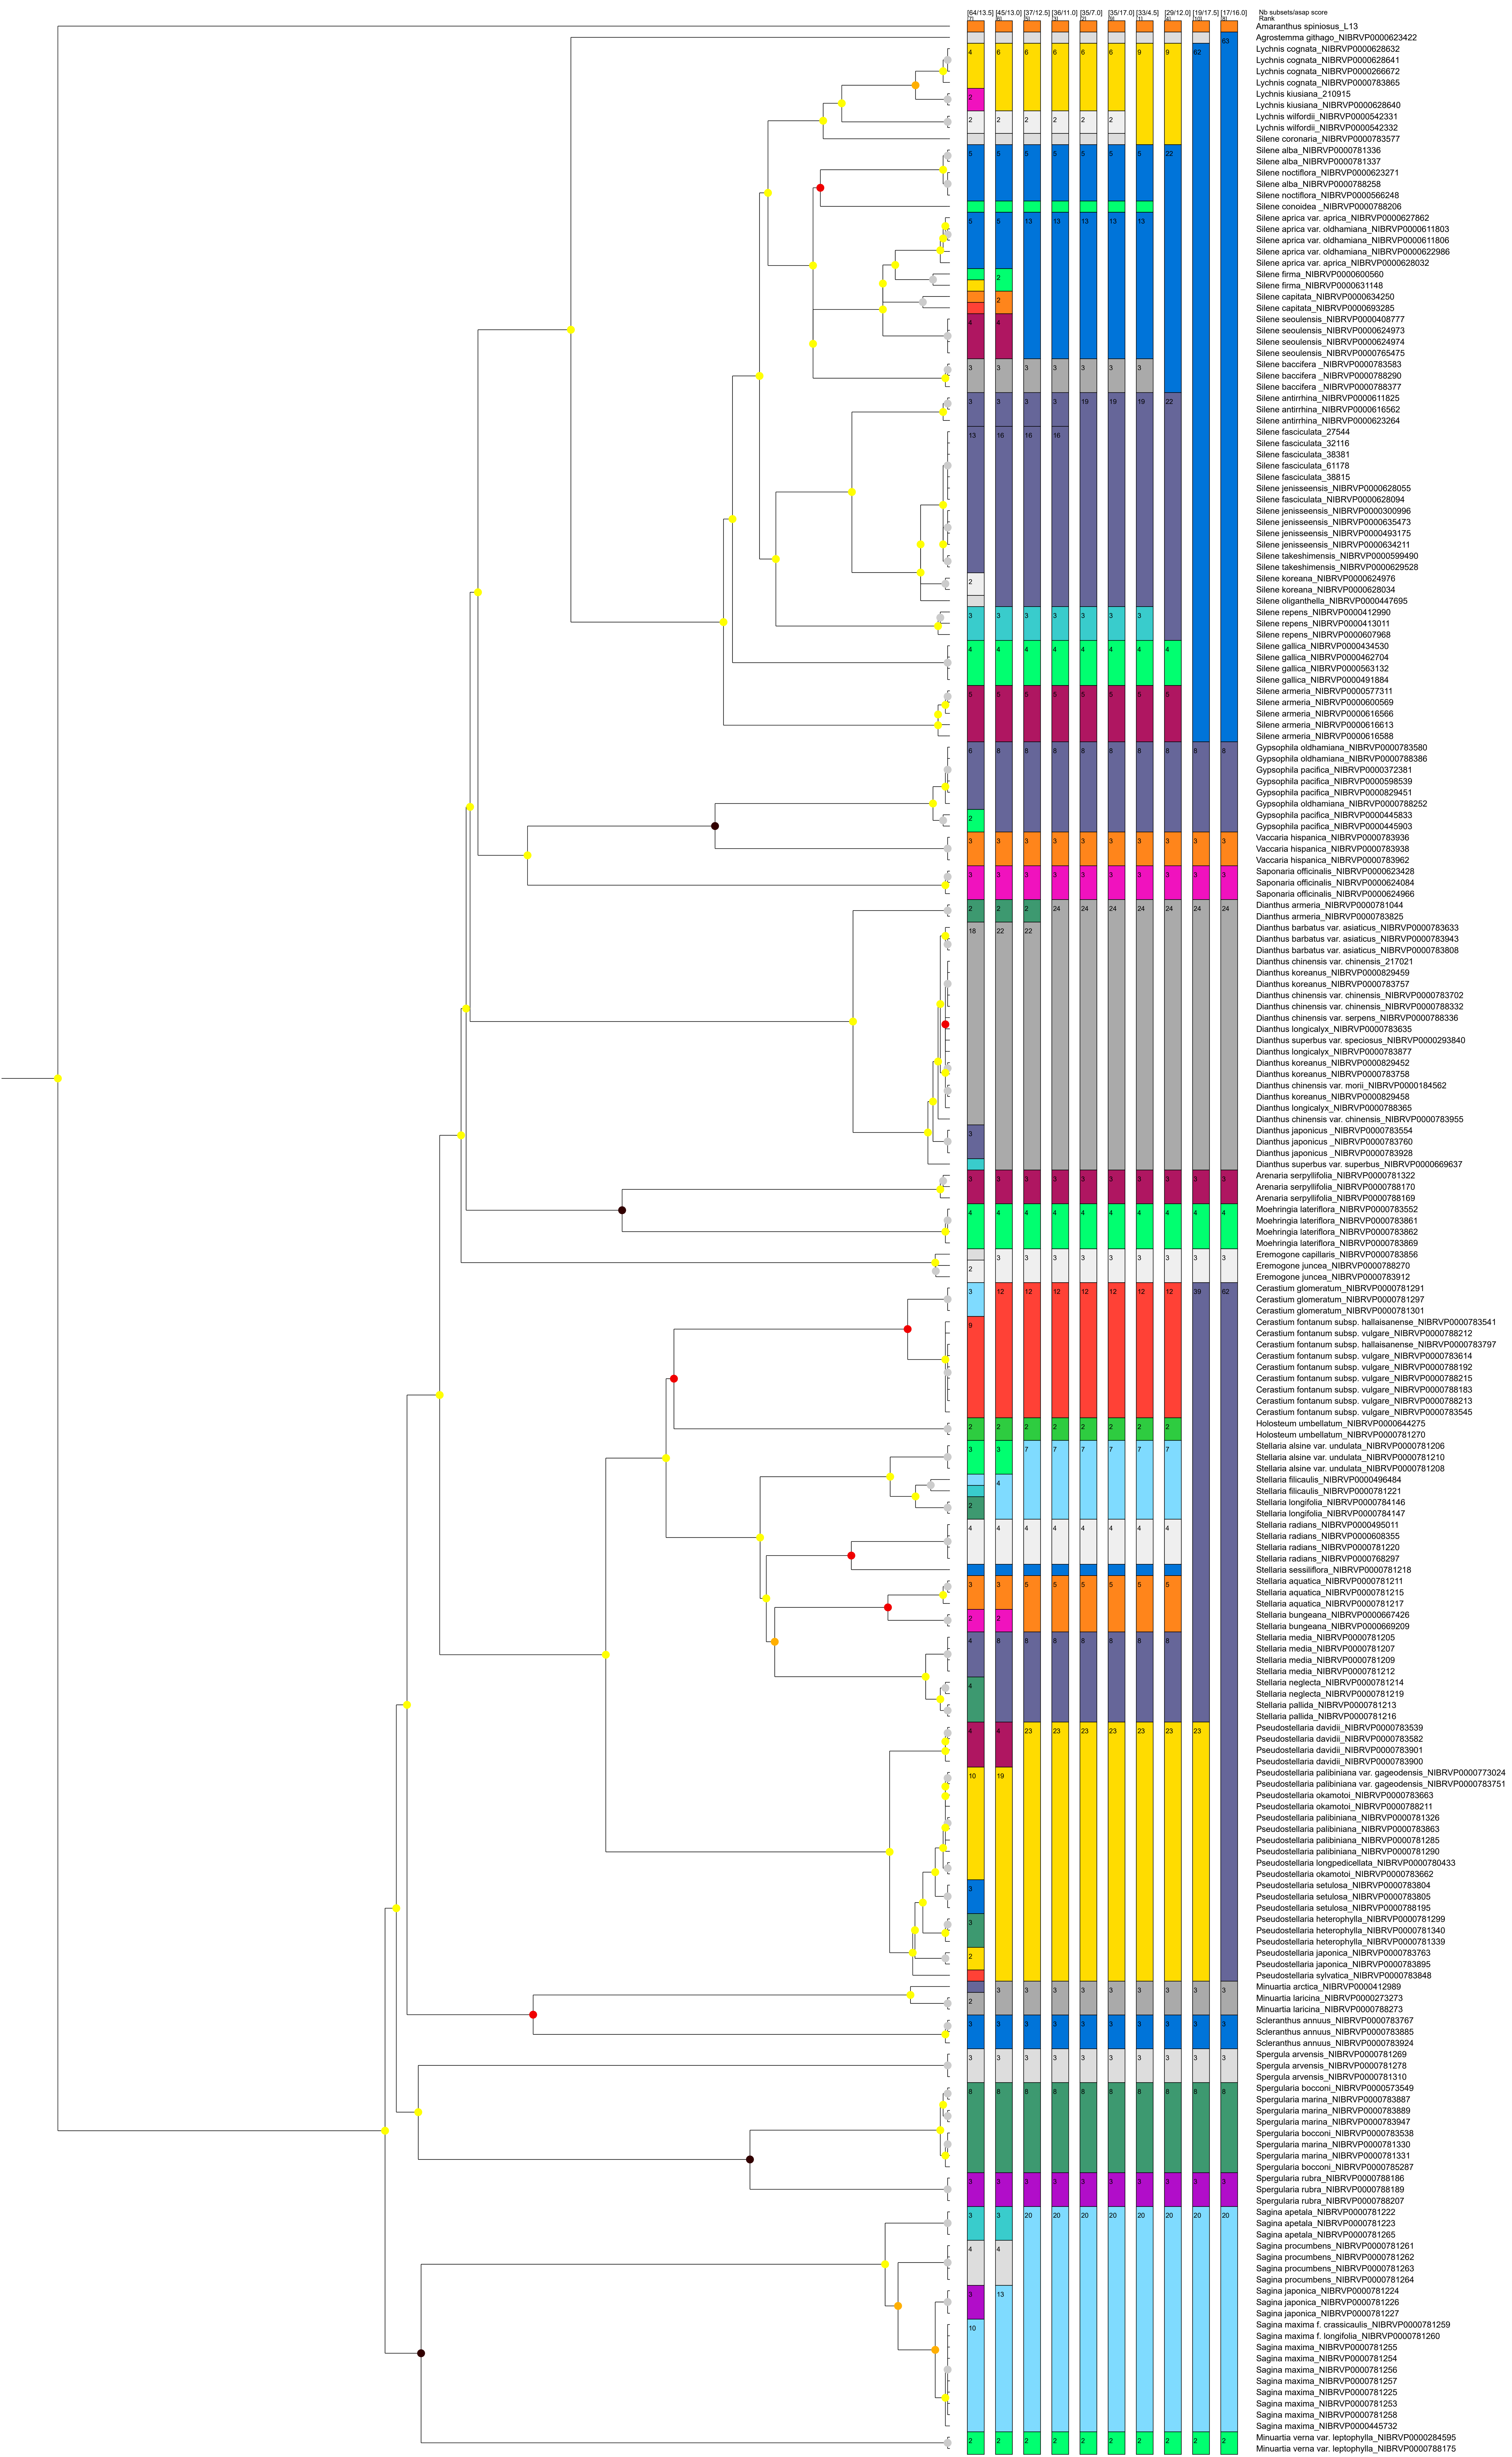

Figure S5. Species partitions through ASAP algorithm based on ITS + matK.



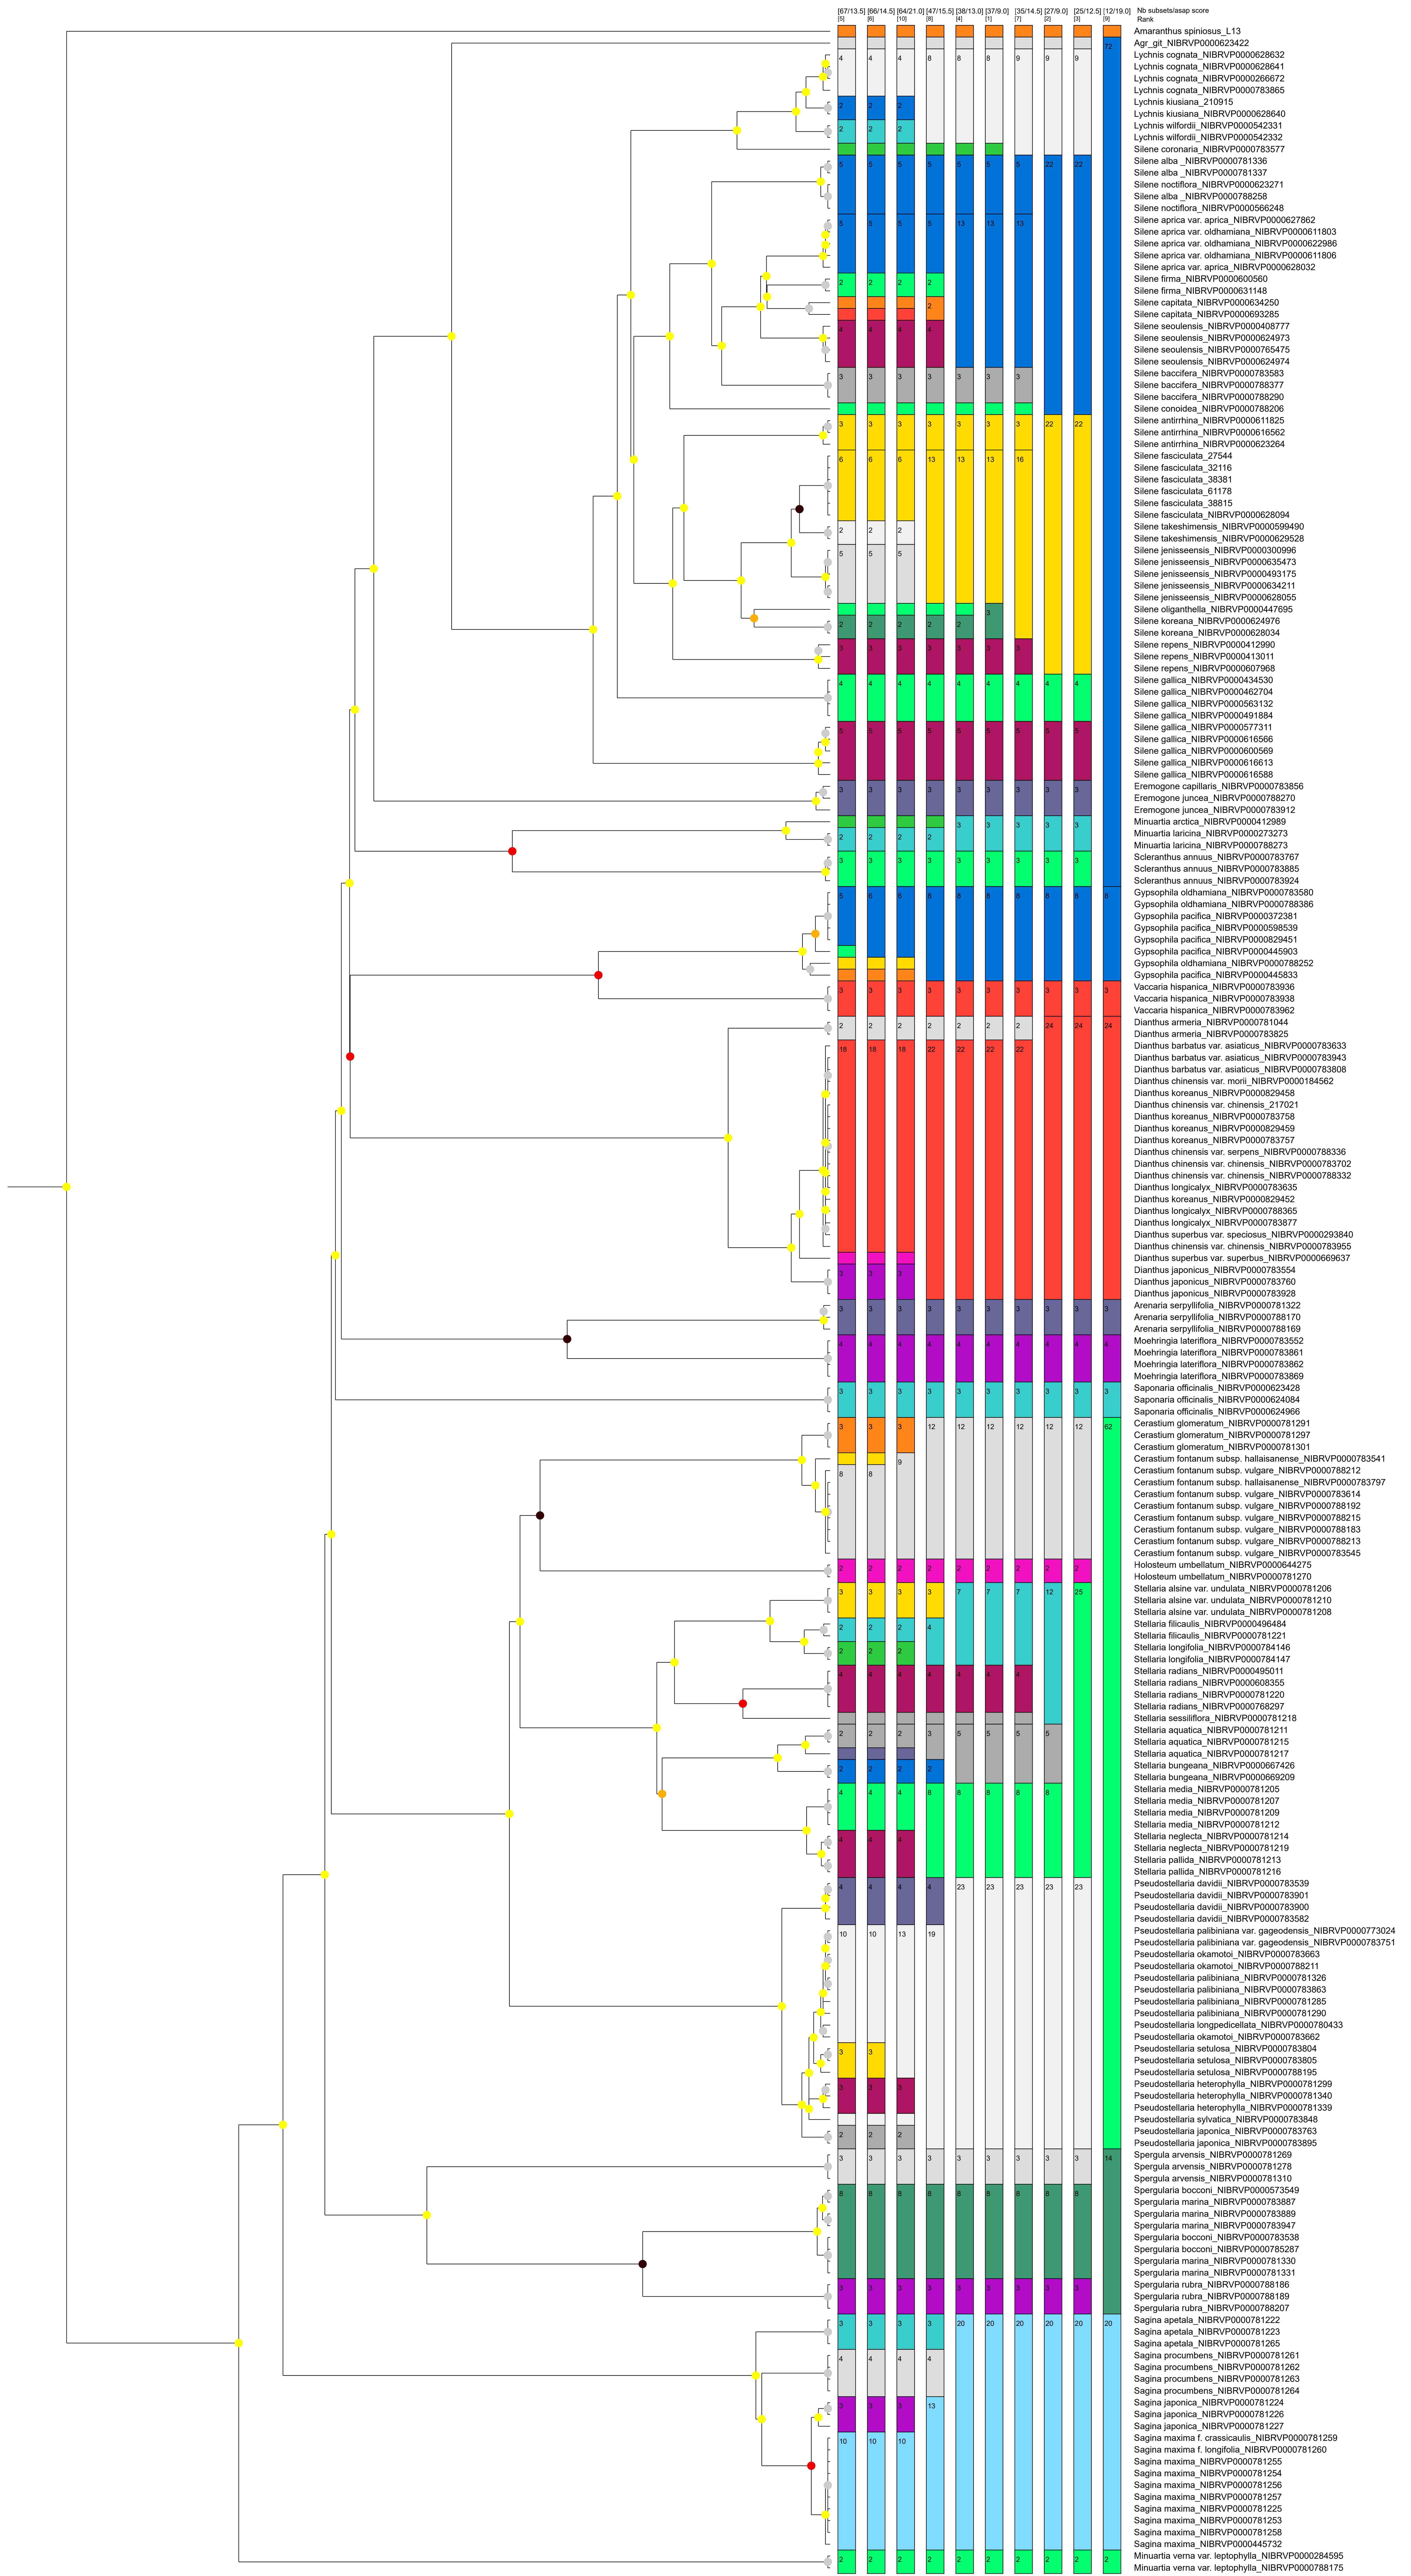



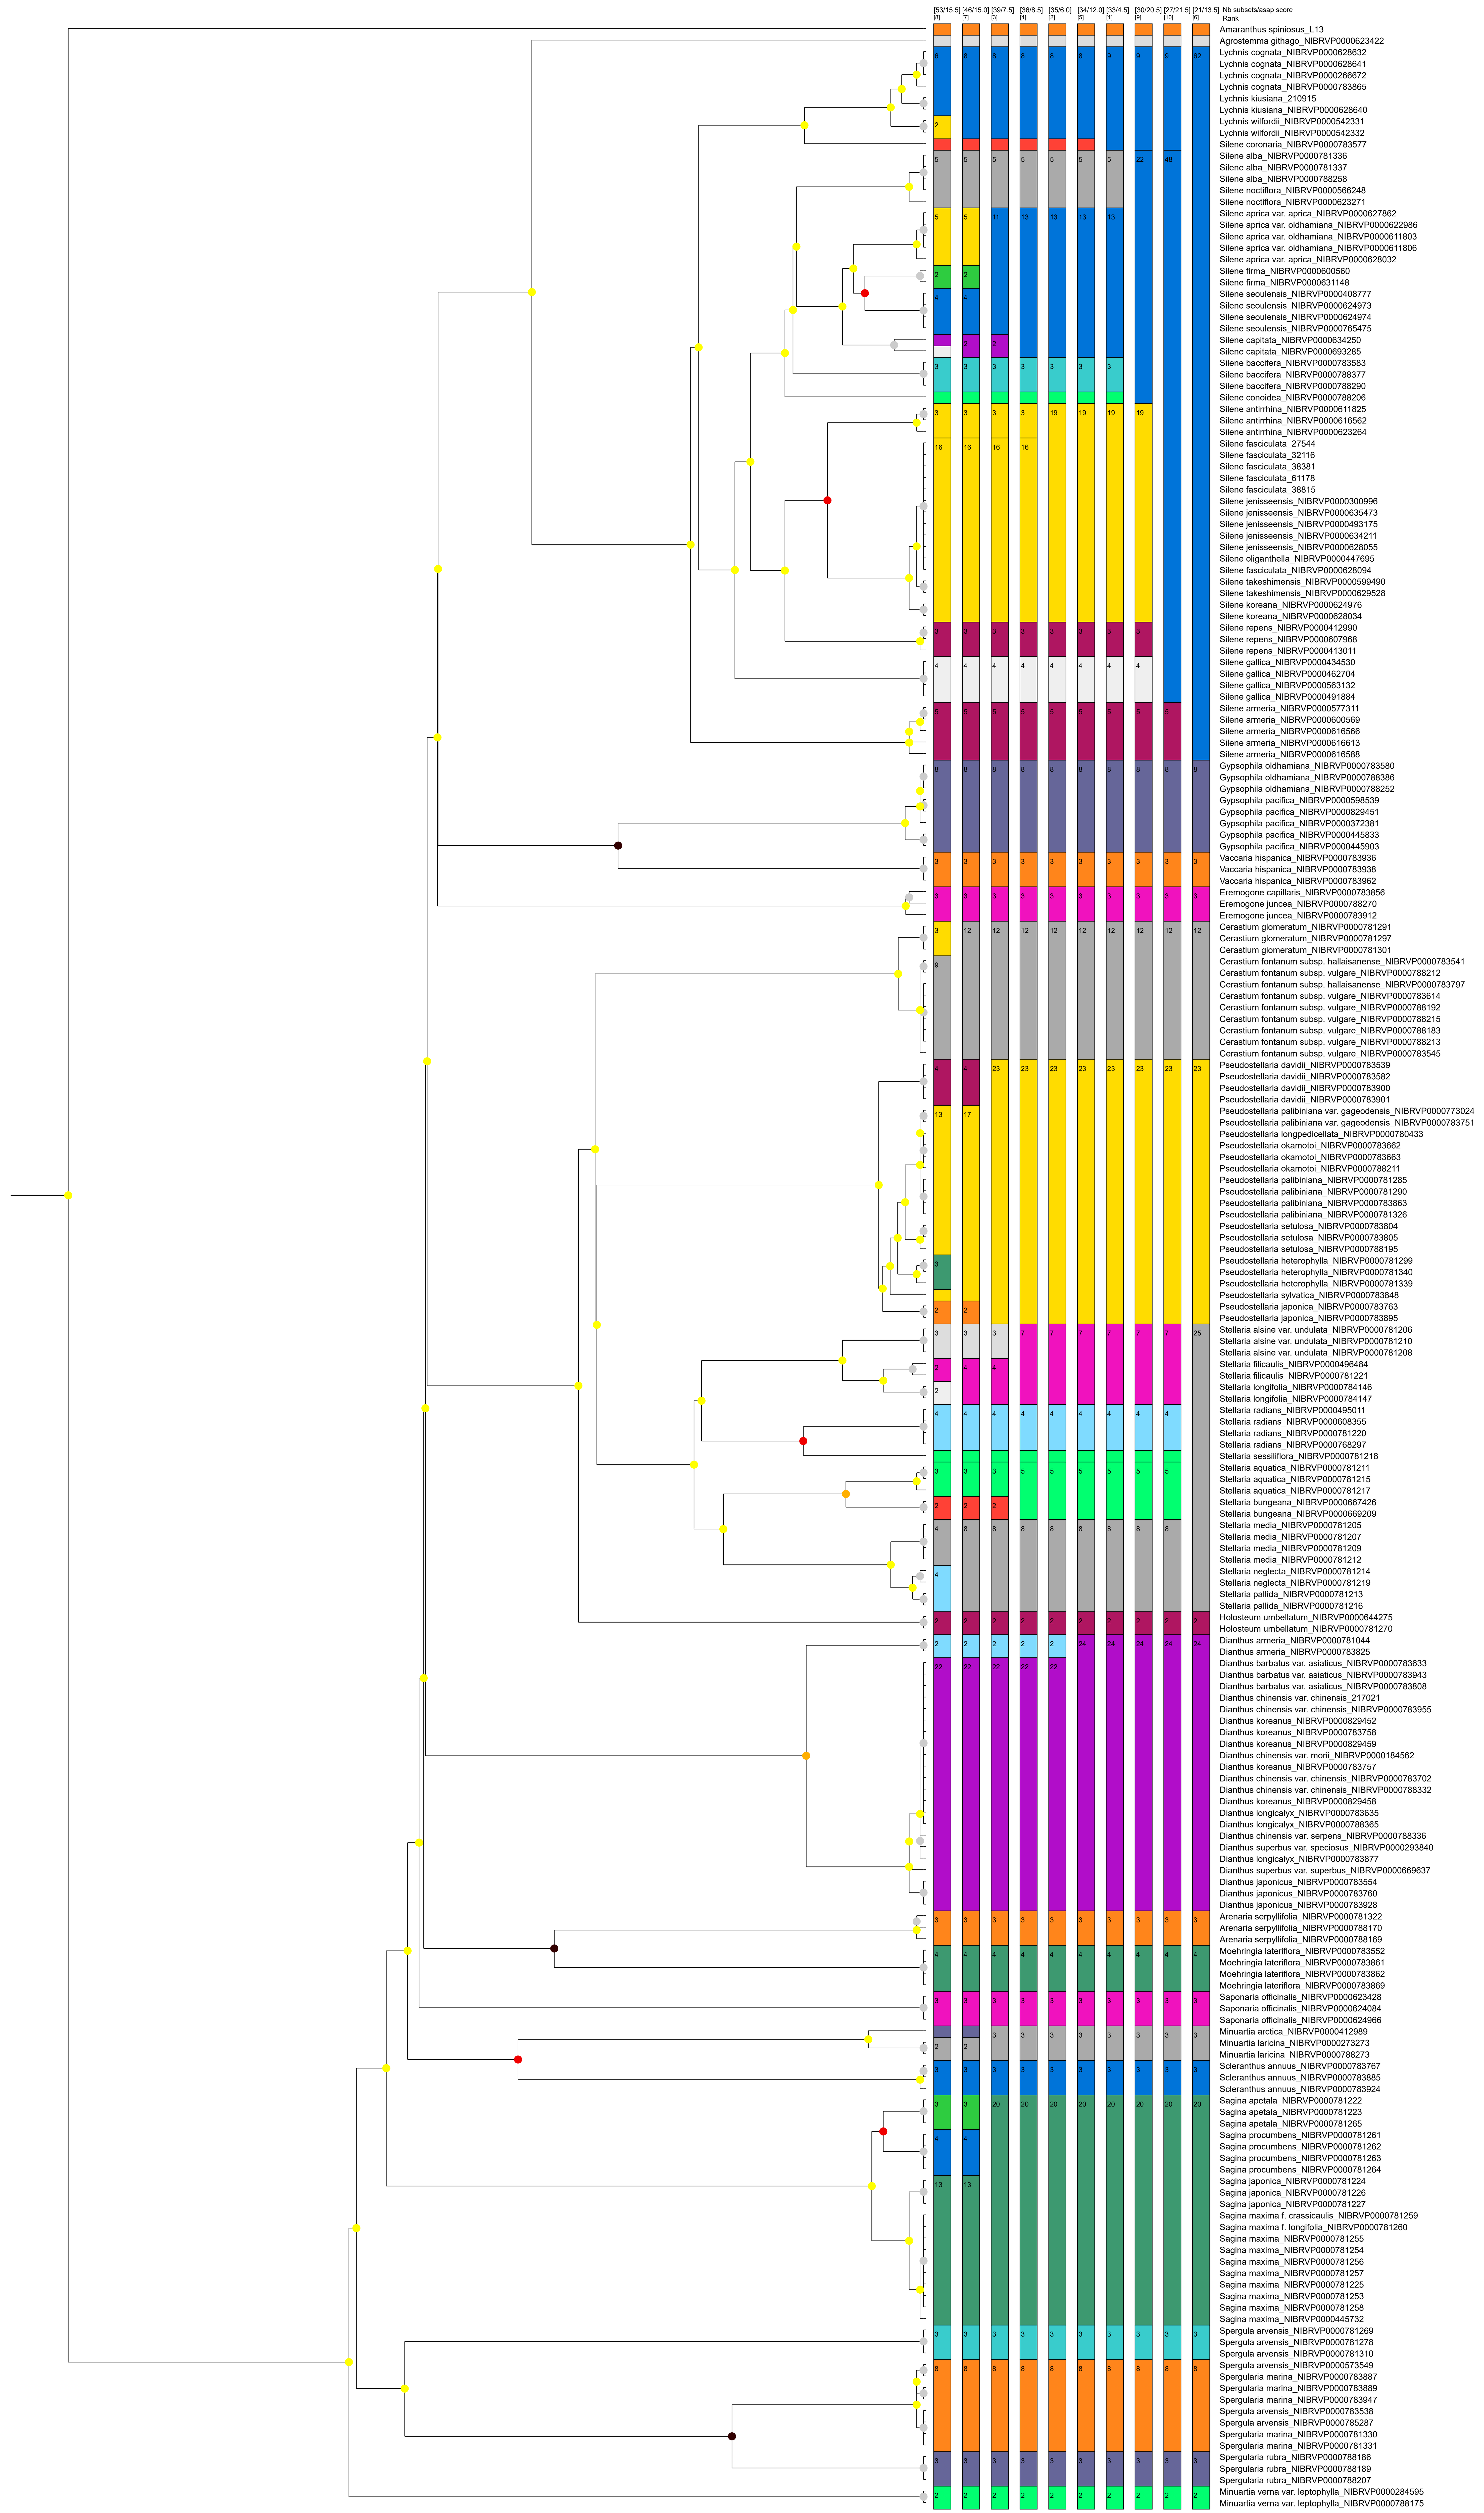



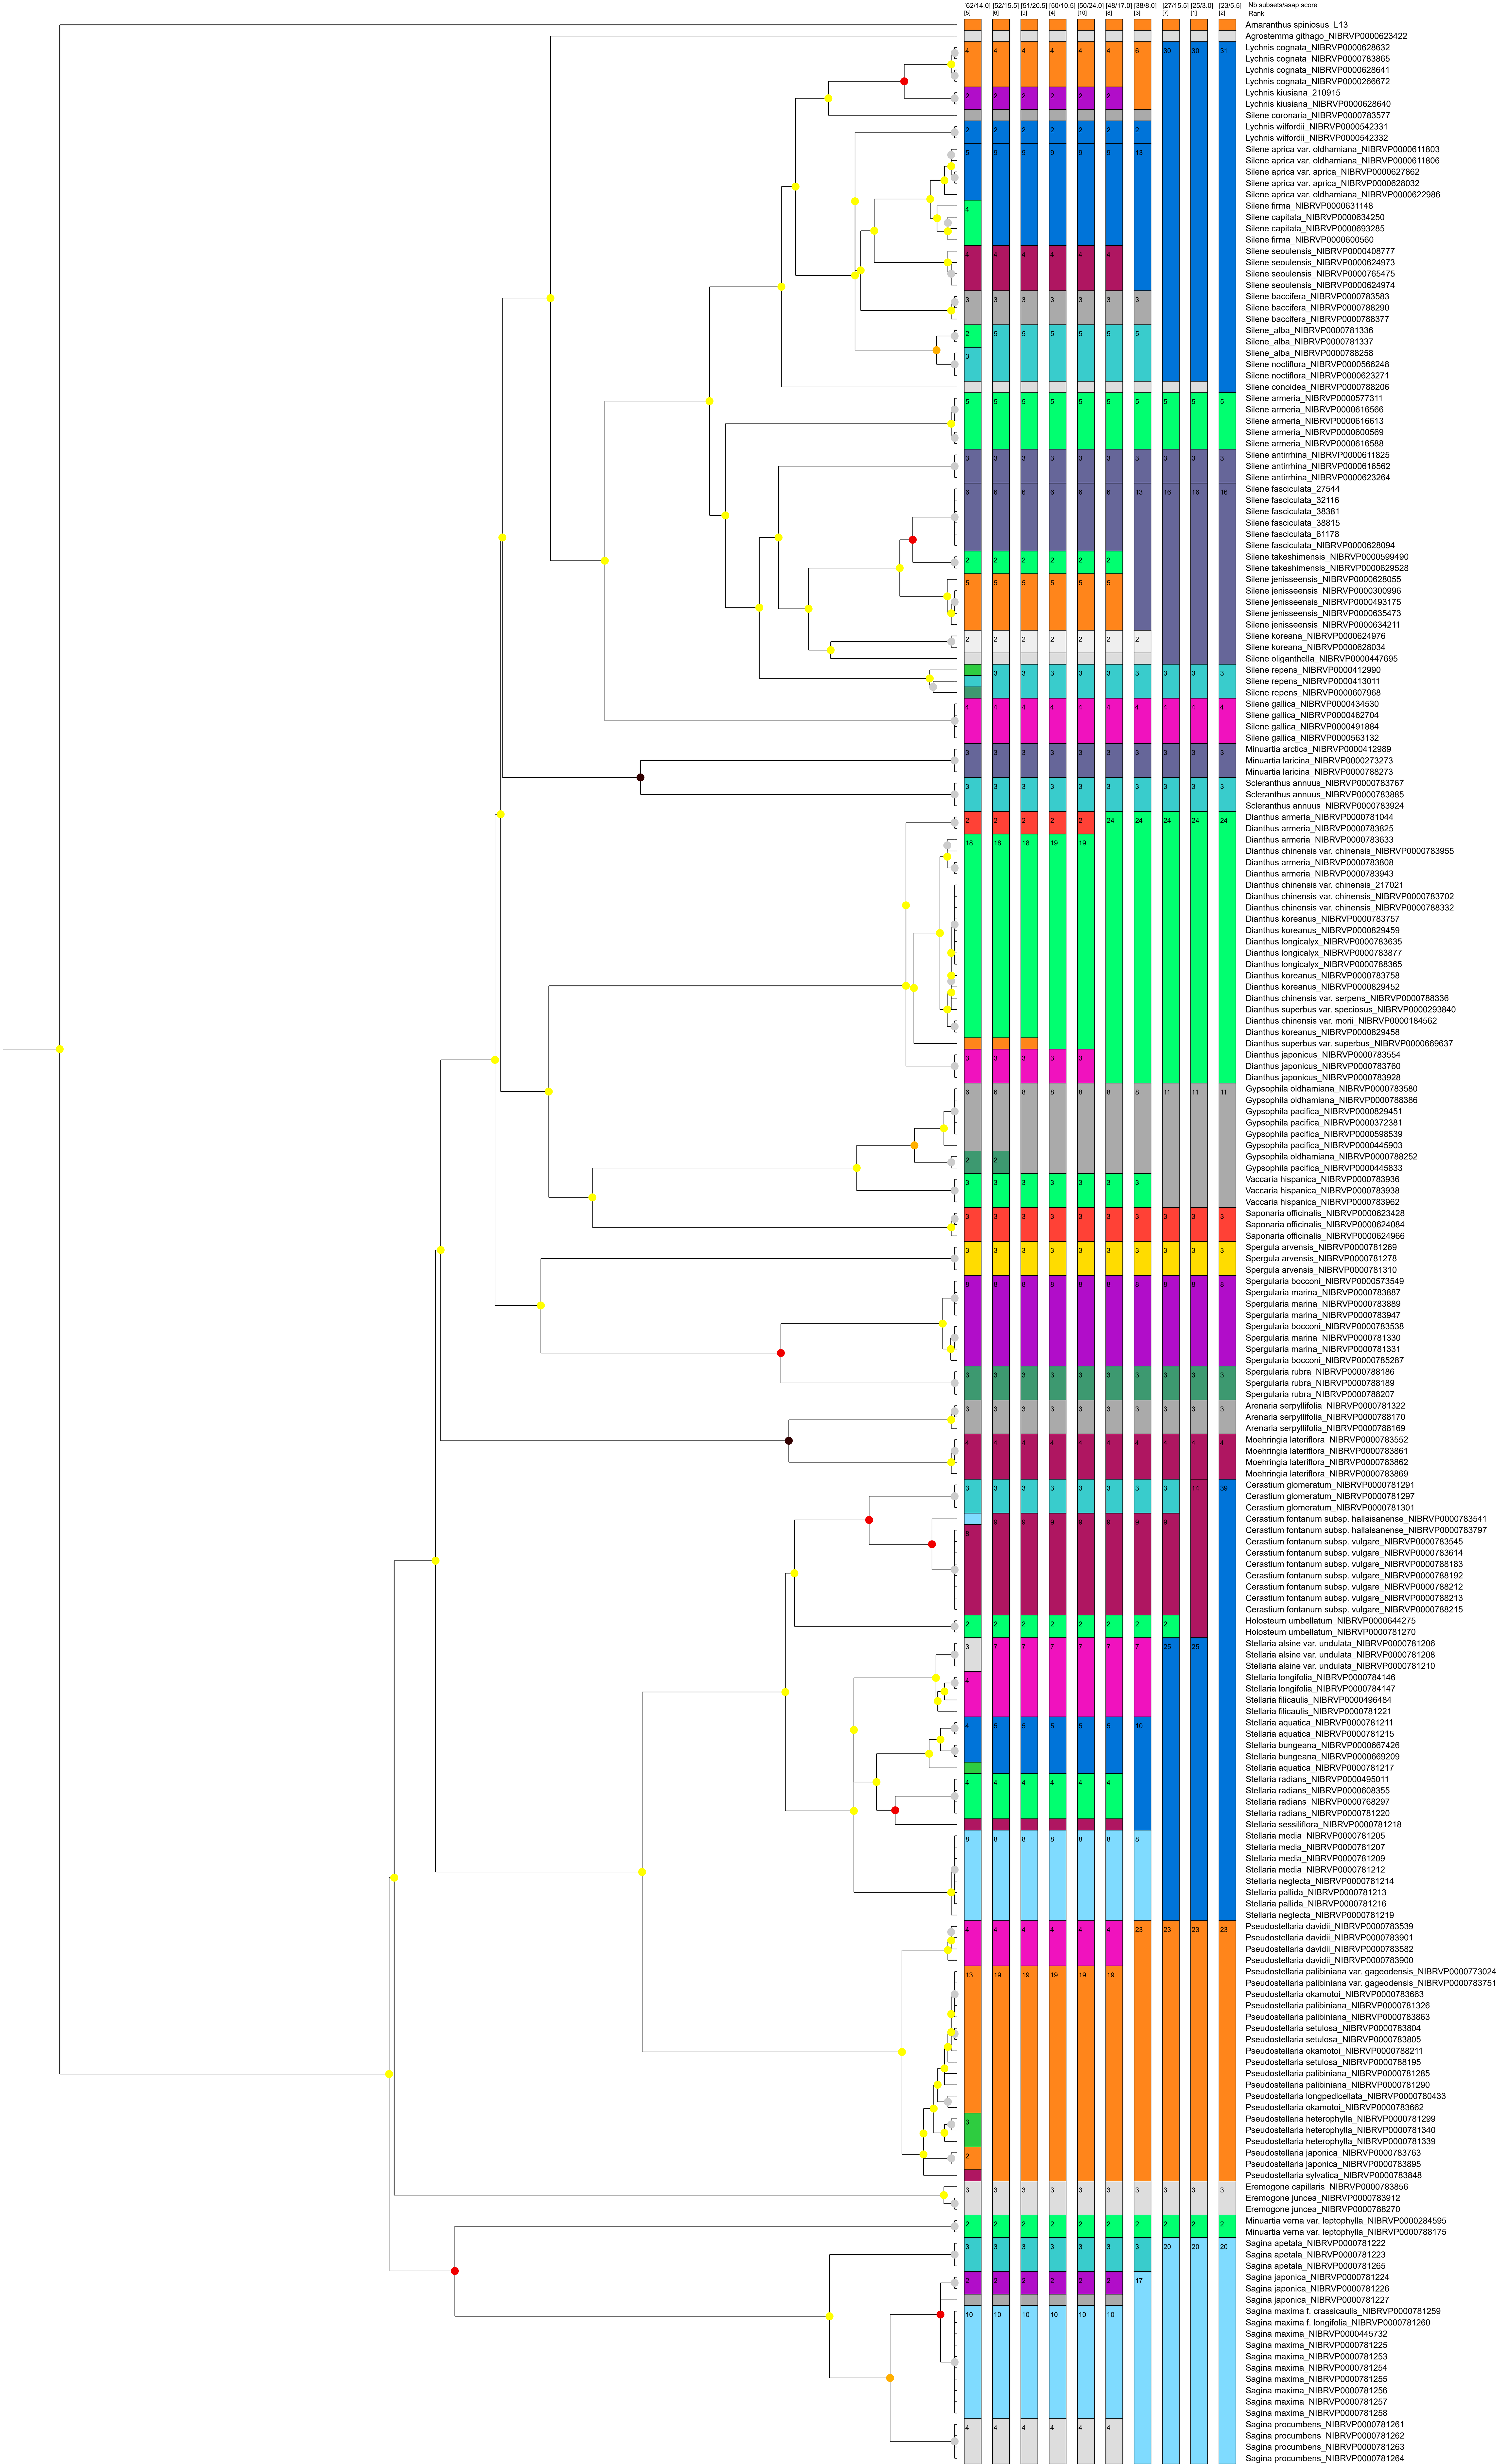

Figure S8. Species partitions through ASAP algorithm based on *matK* + *psbA-trnH*.



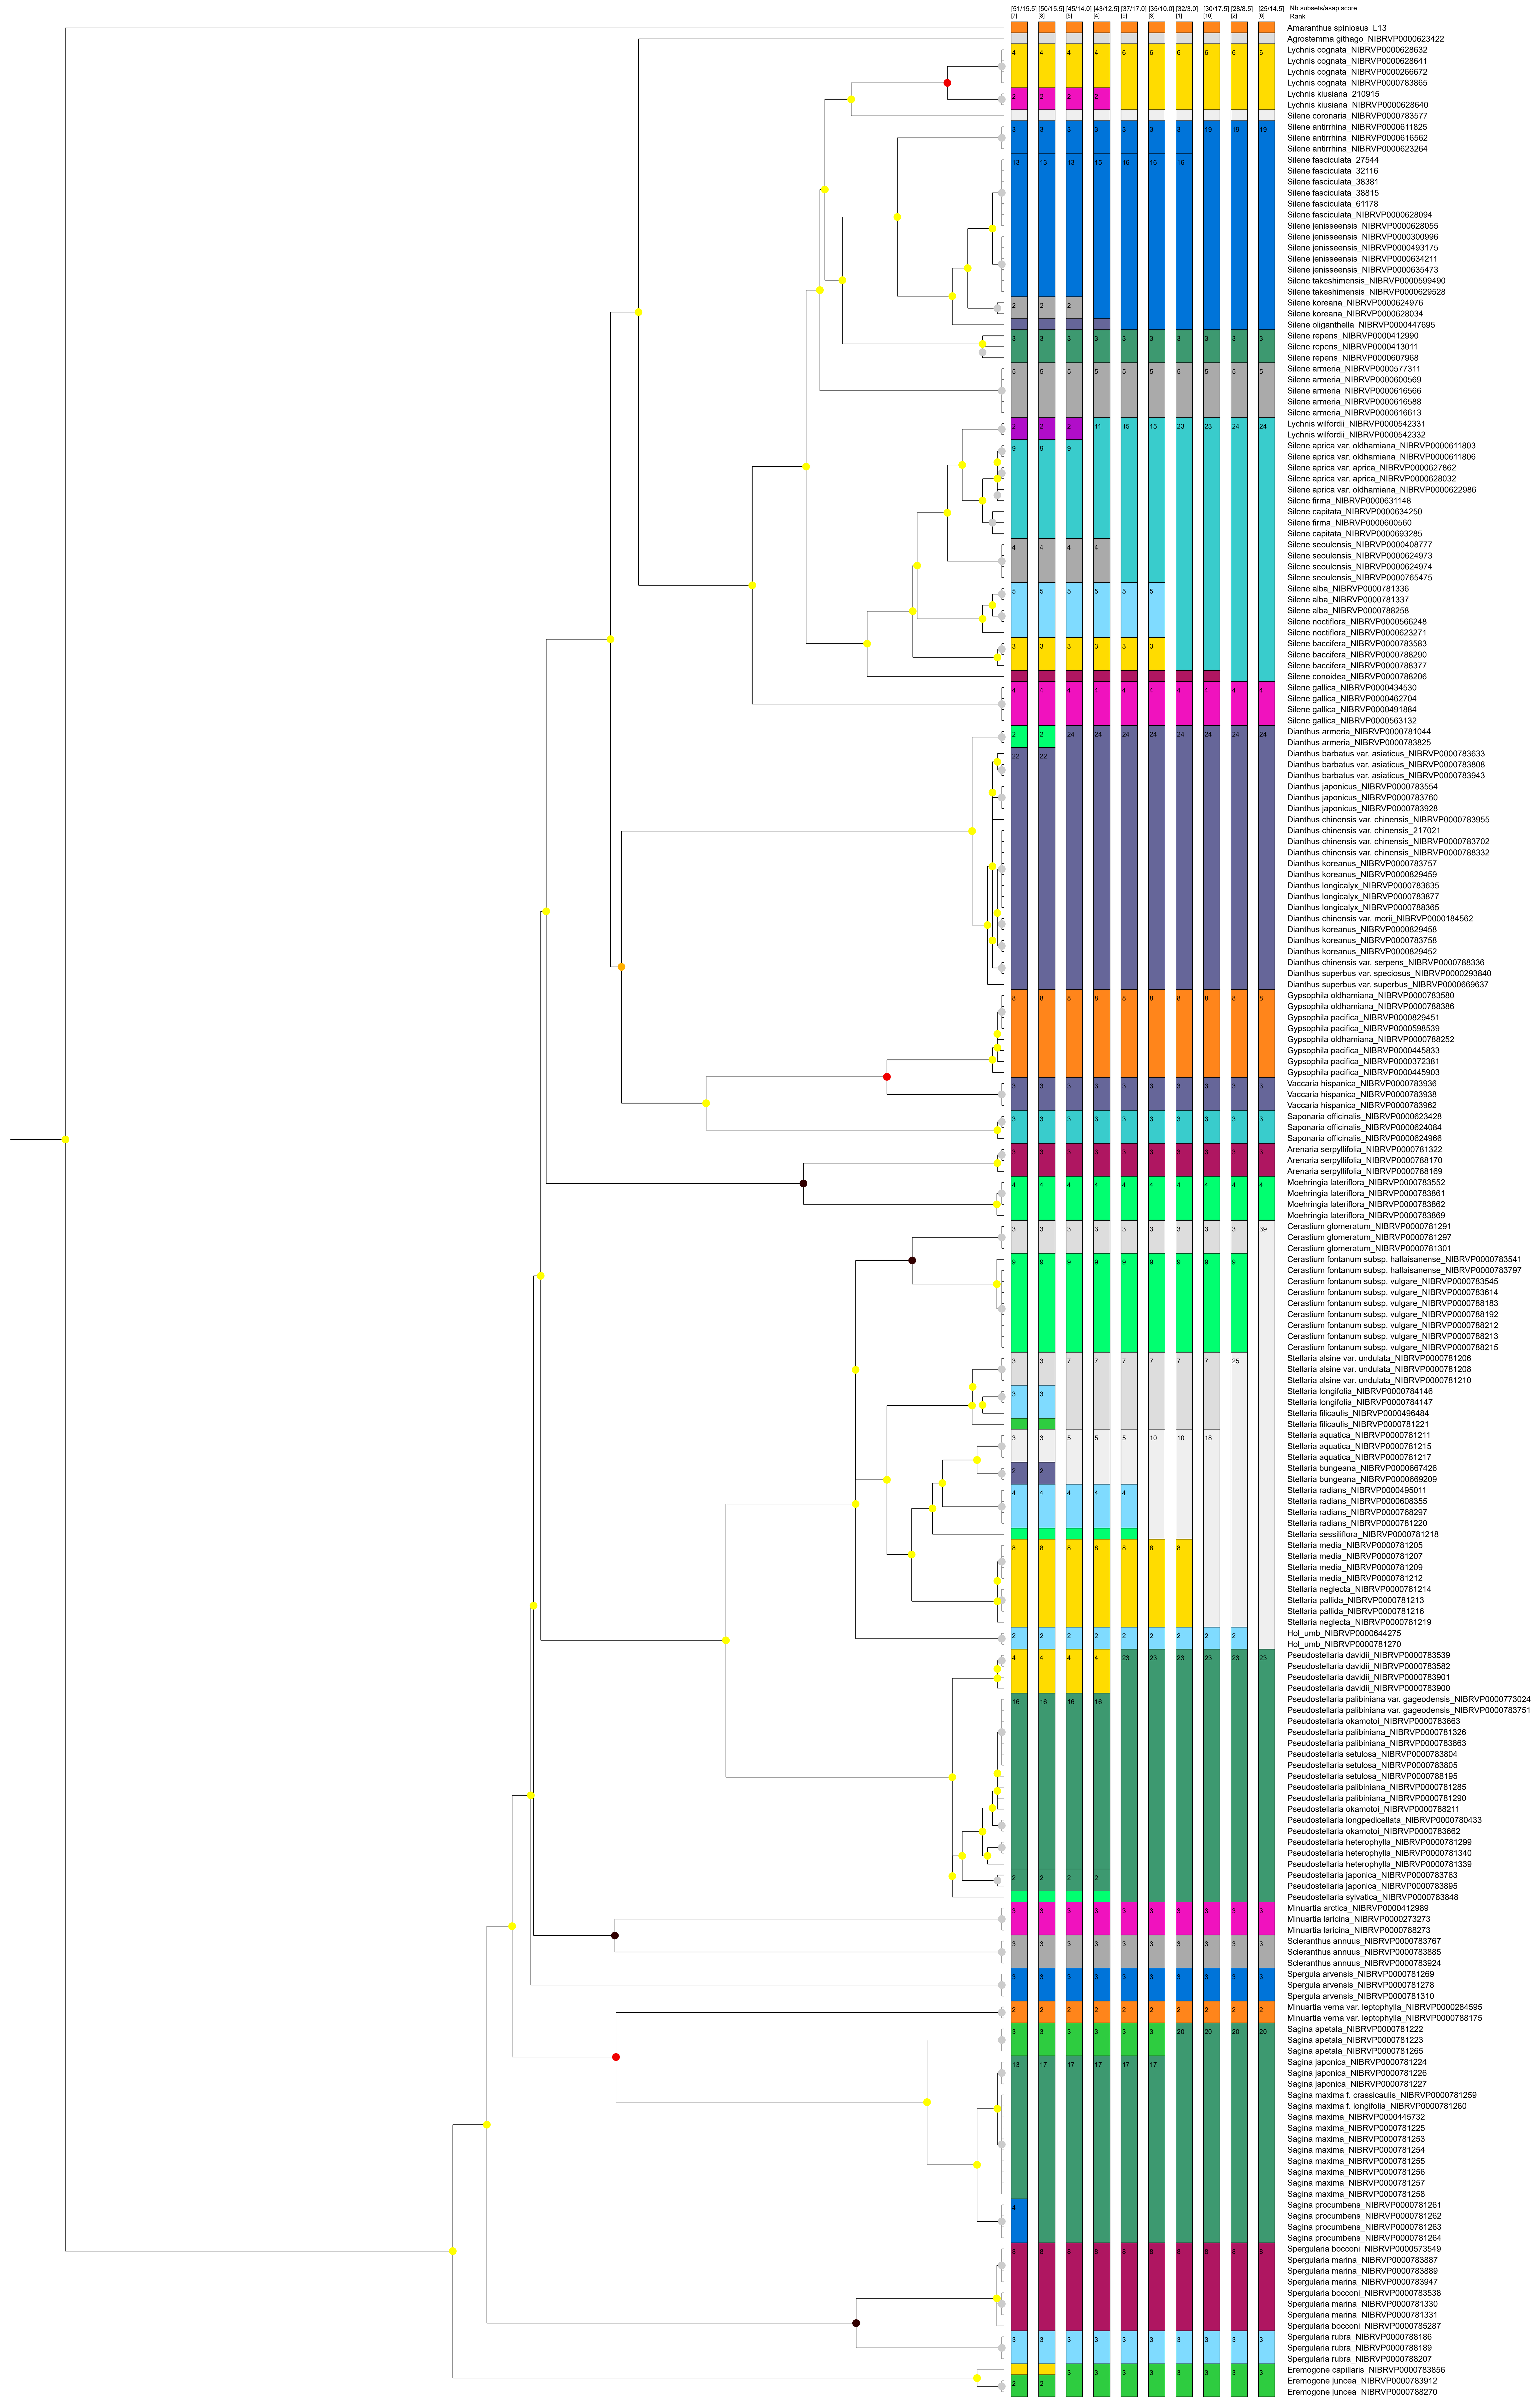

Figure S9. Species partitions through ASAP algorithm based on *matK* + *rbcL*.







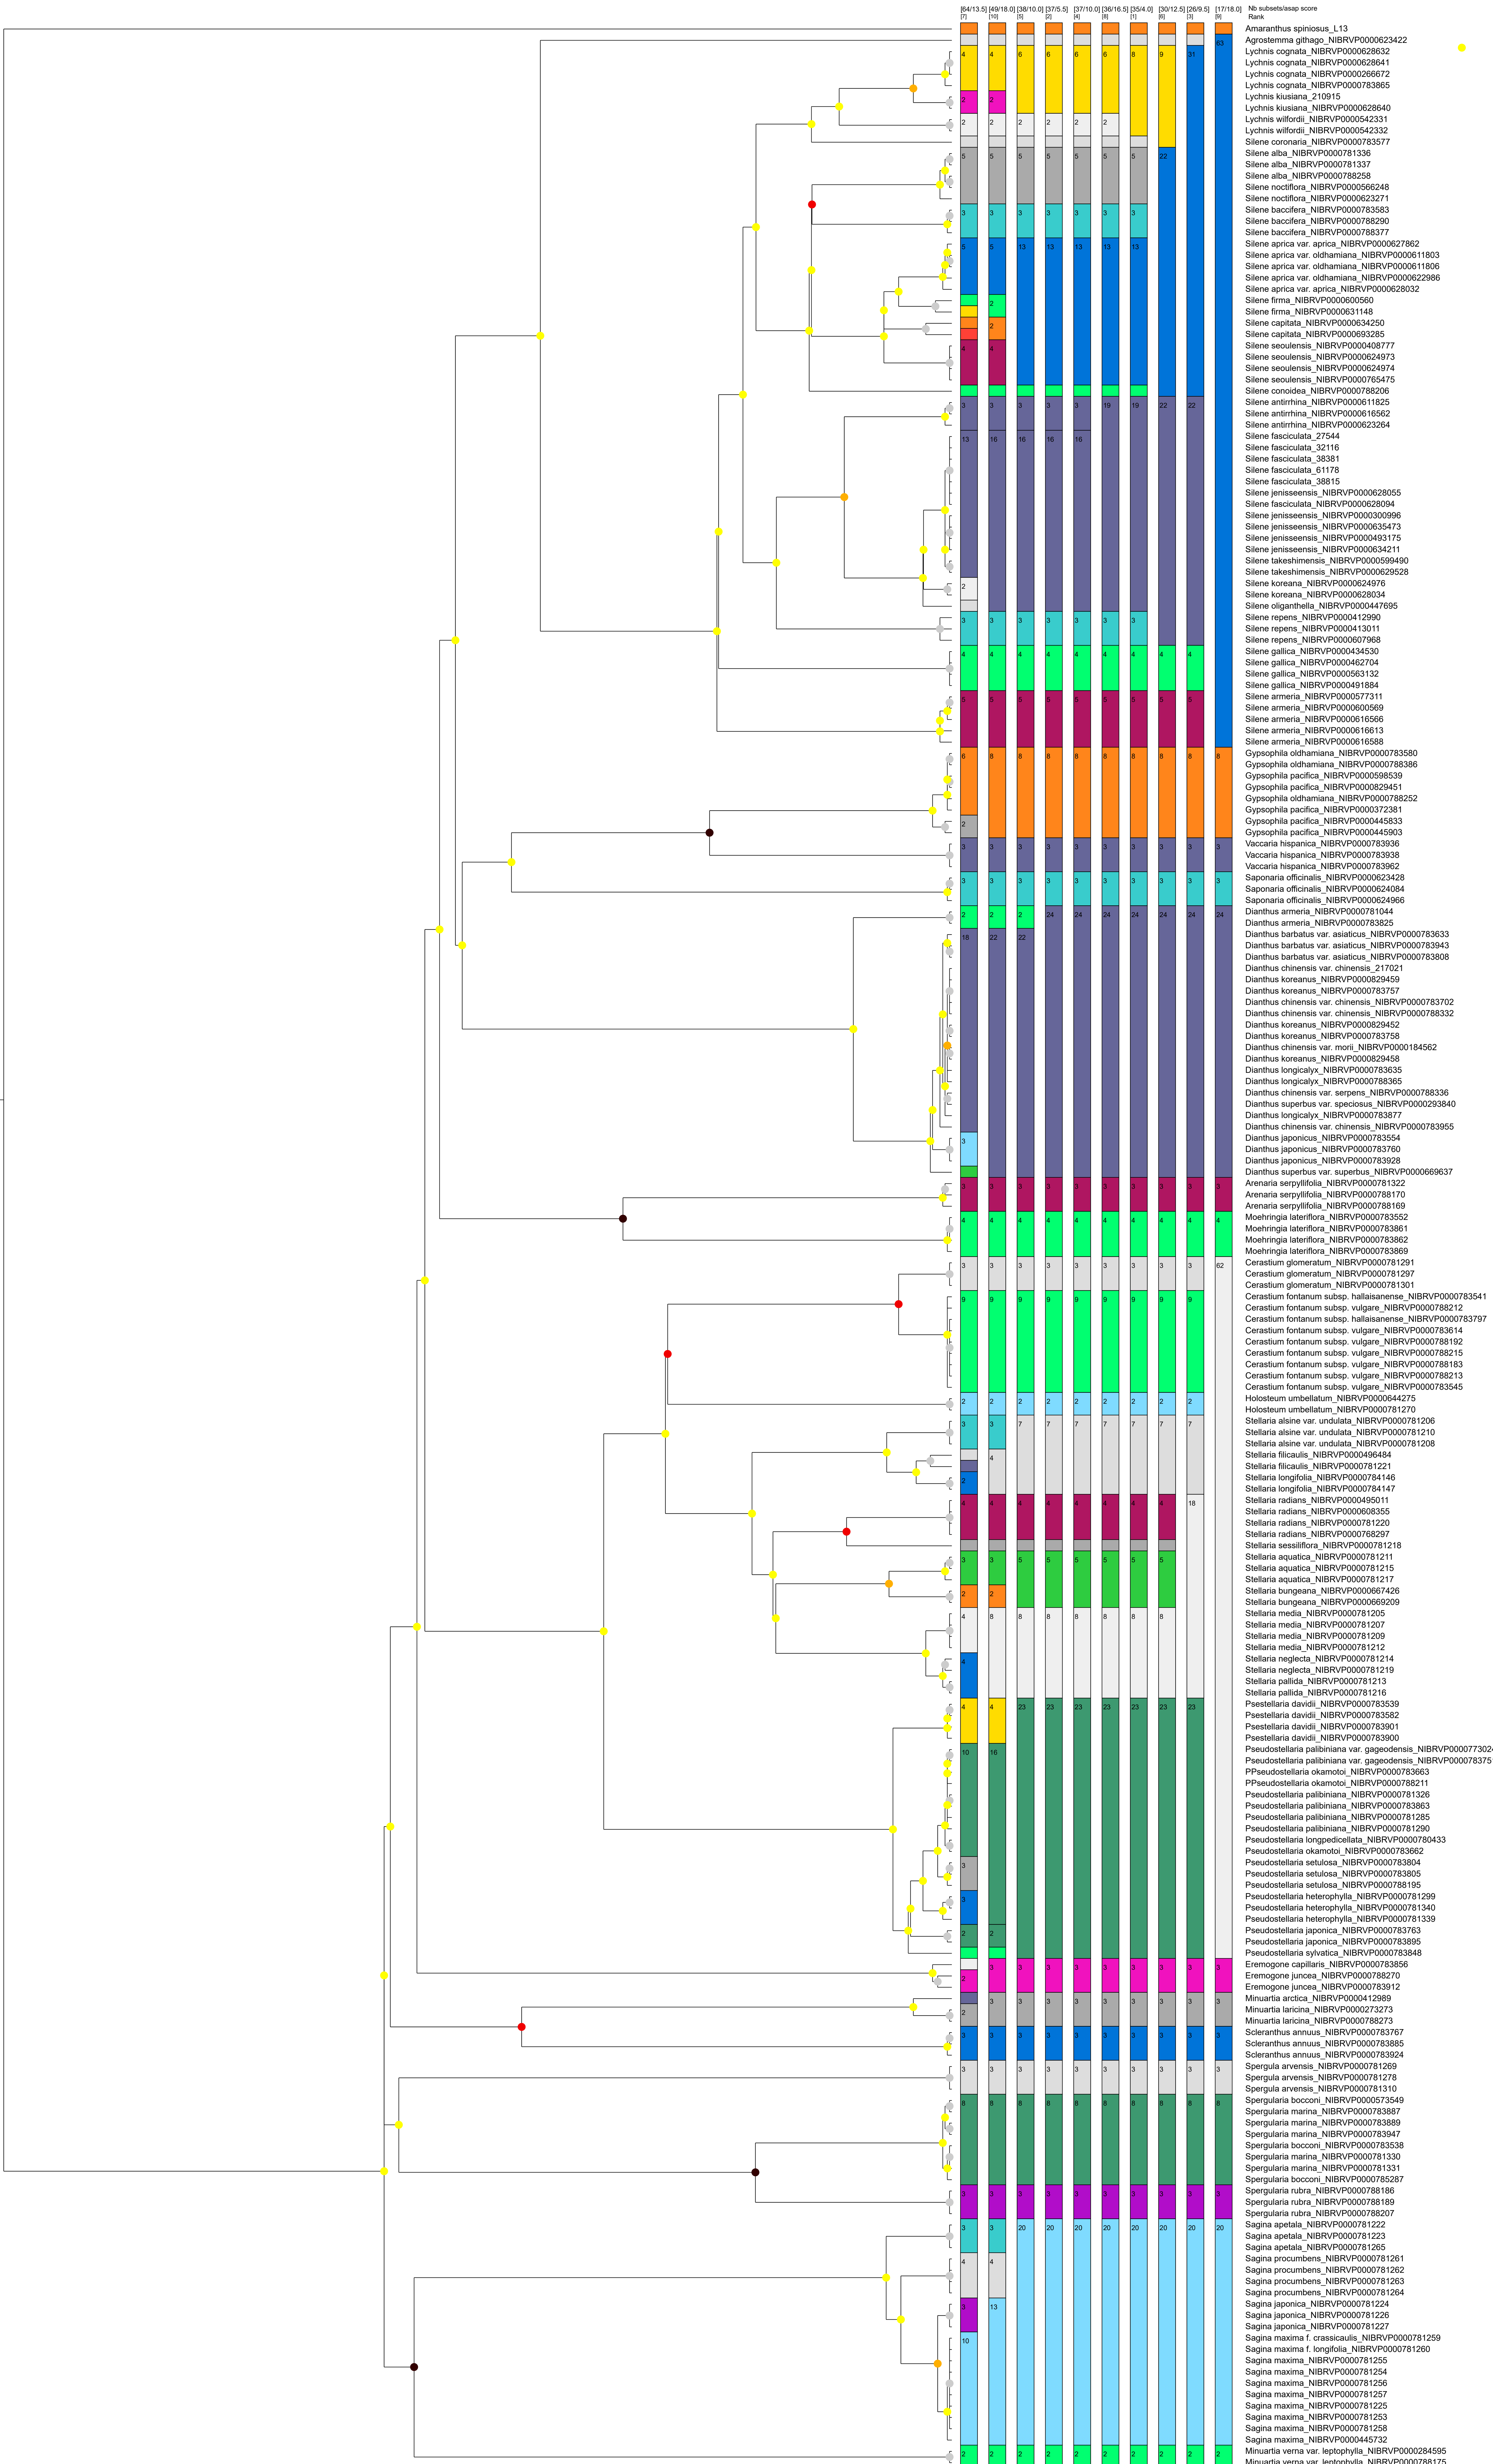



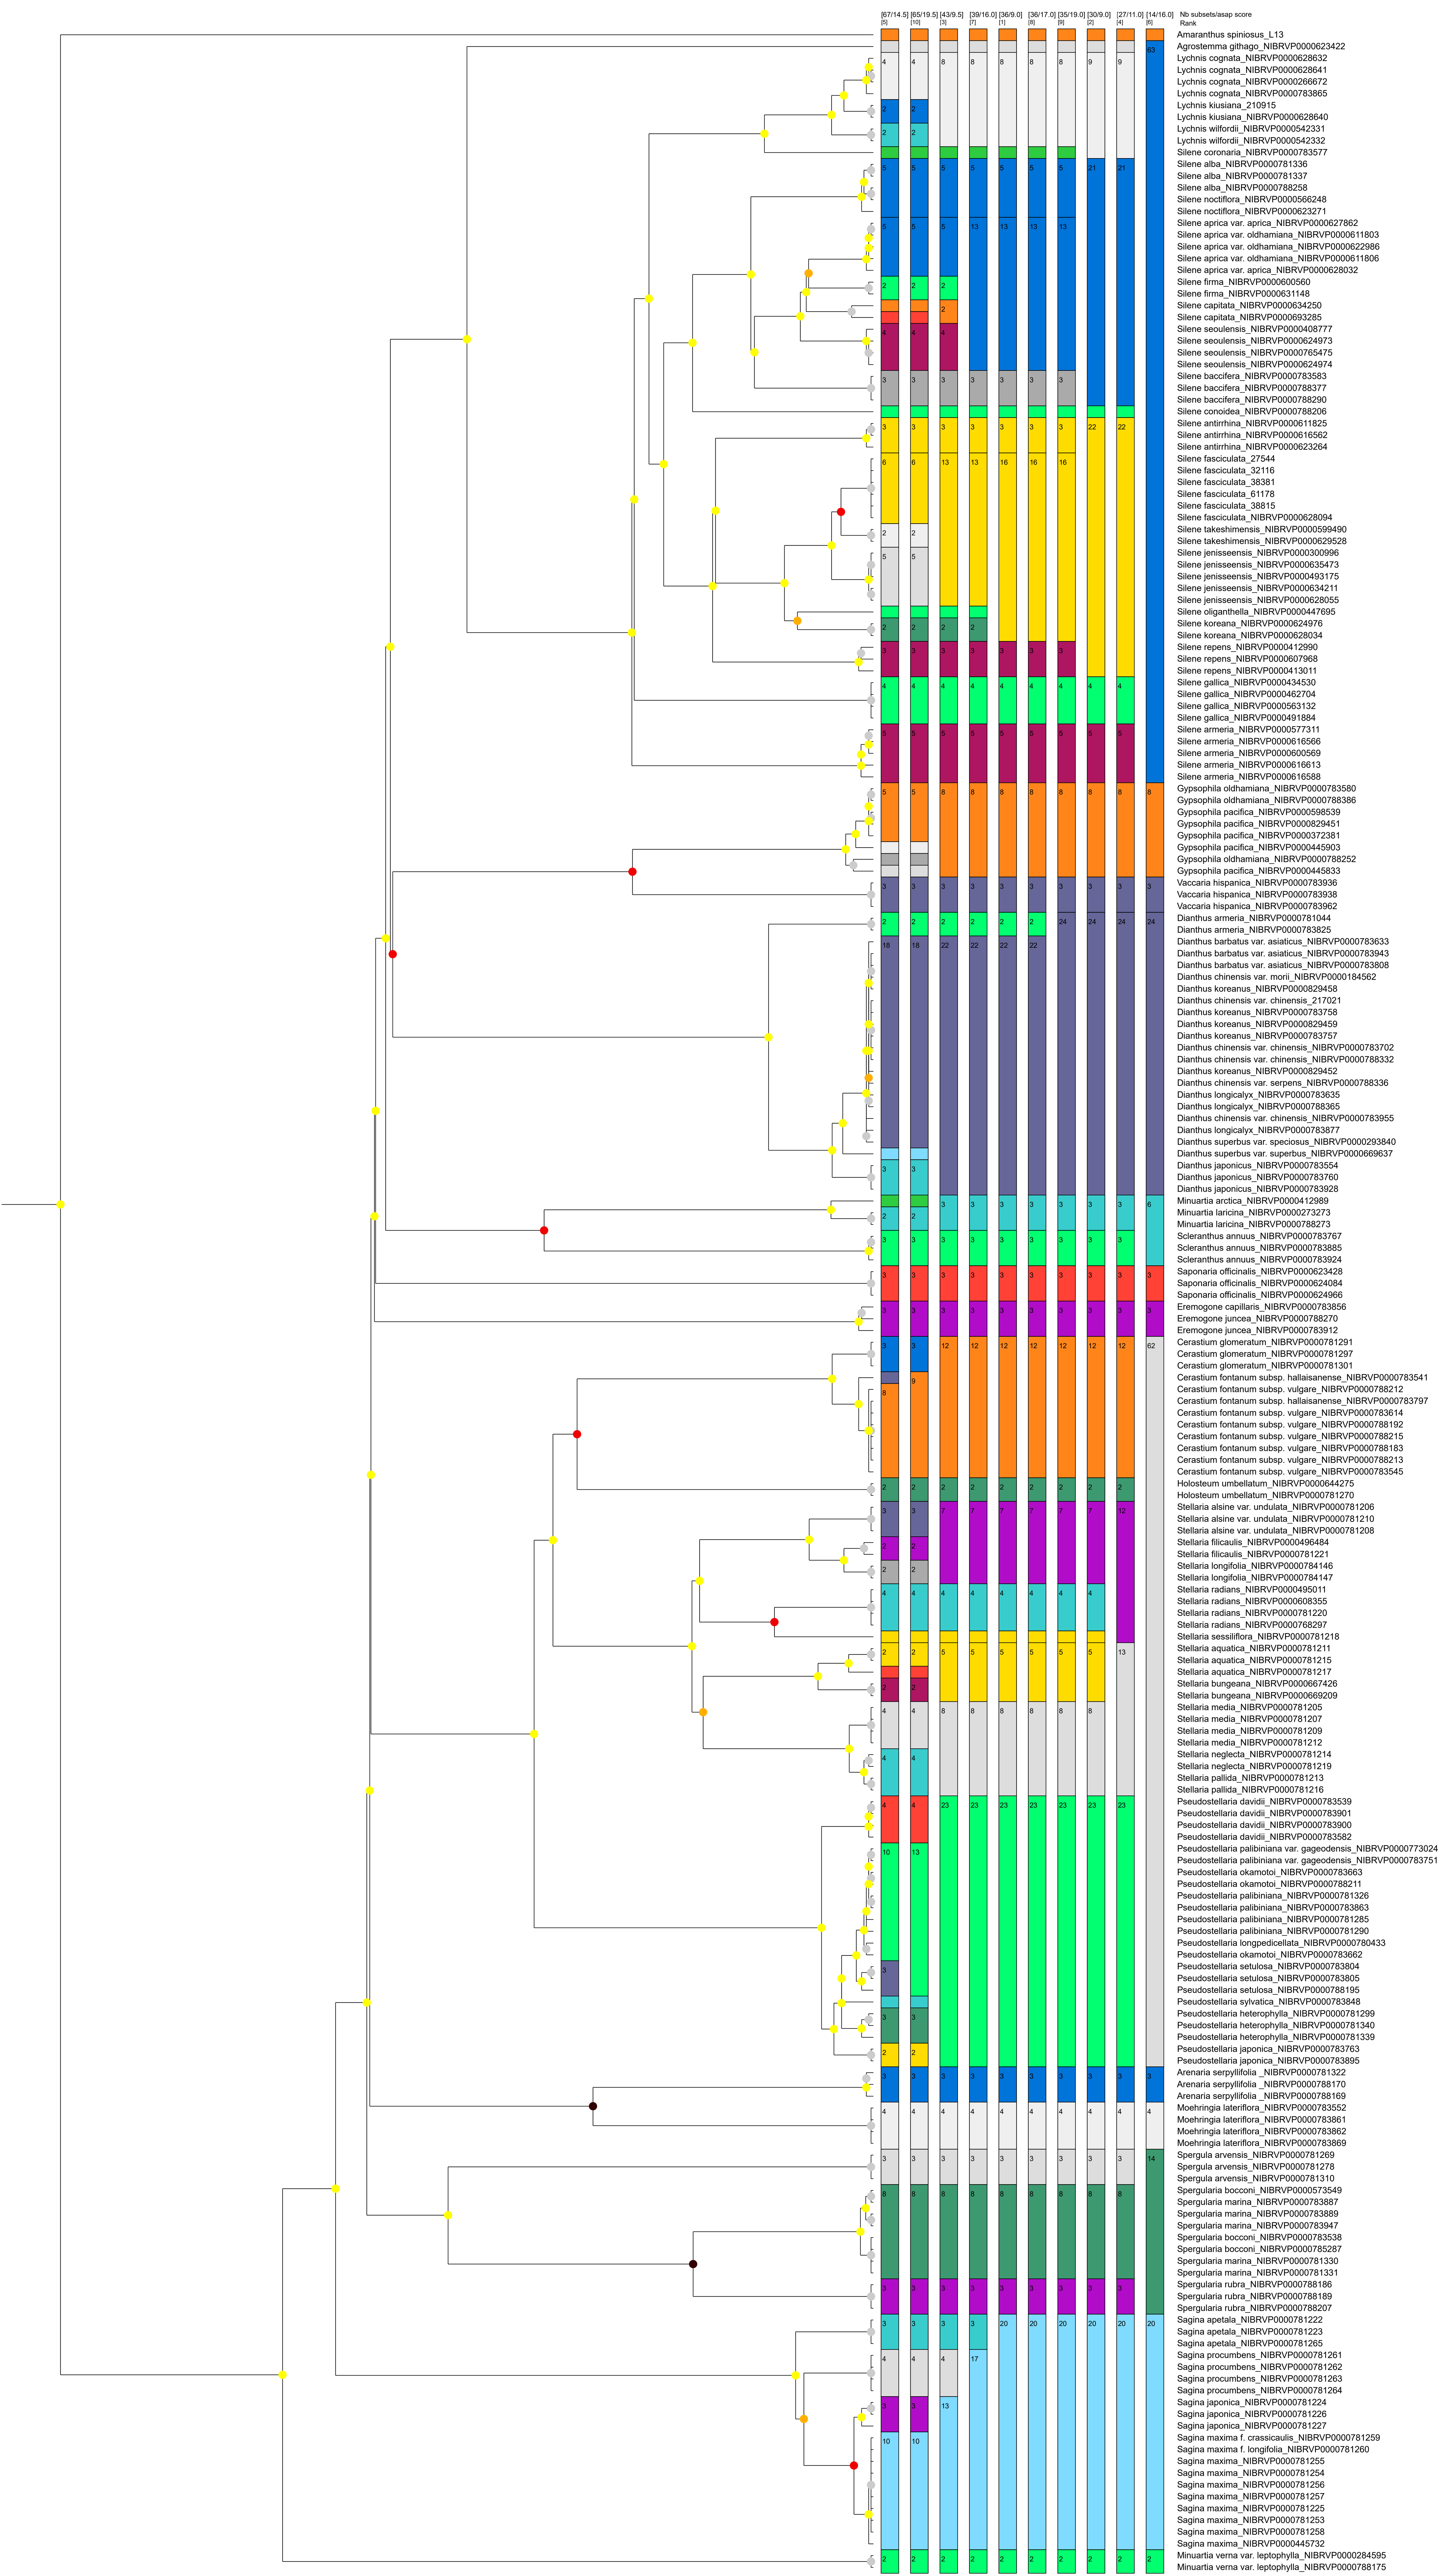



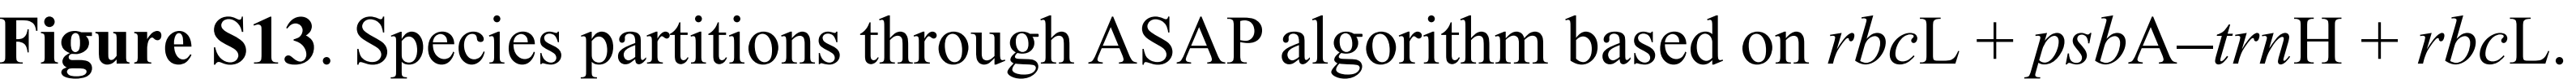



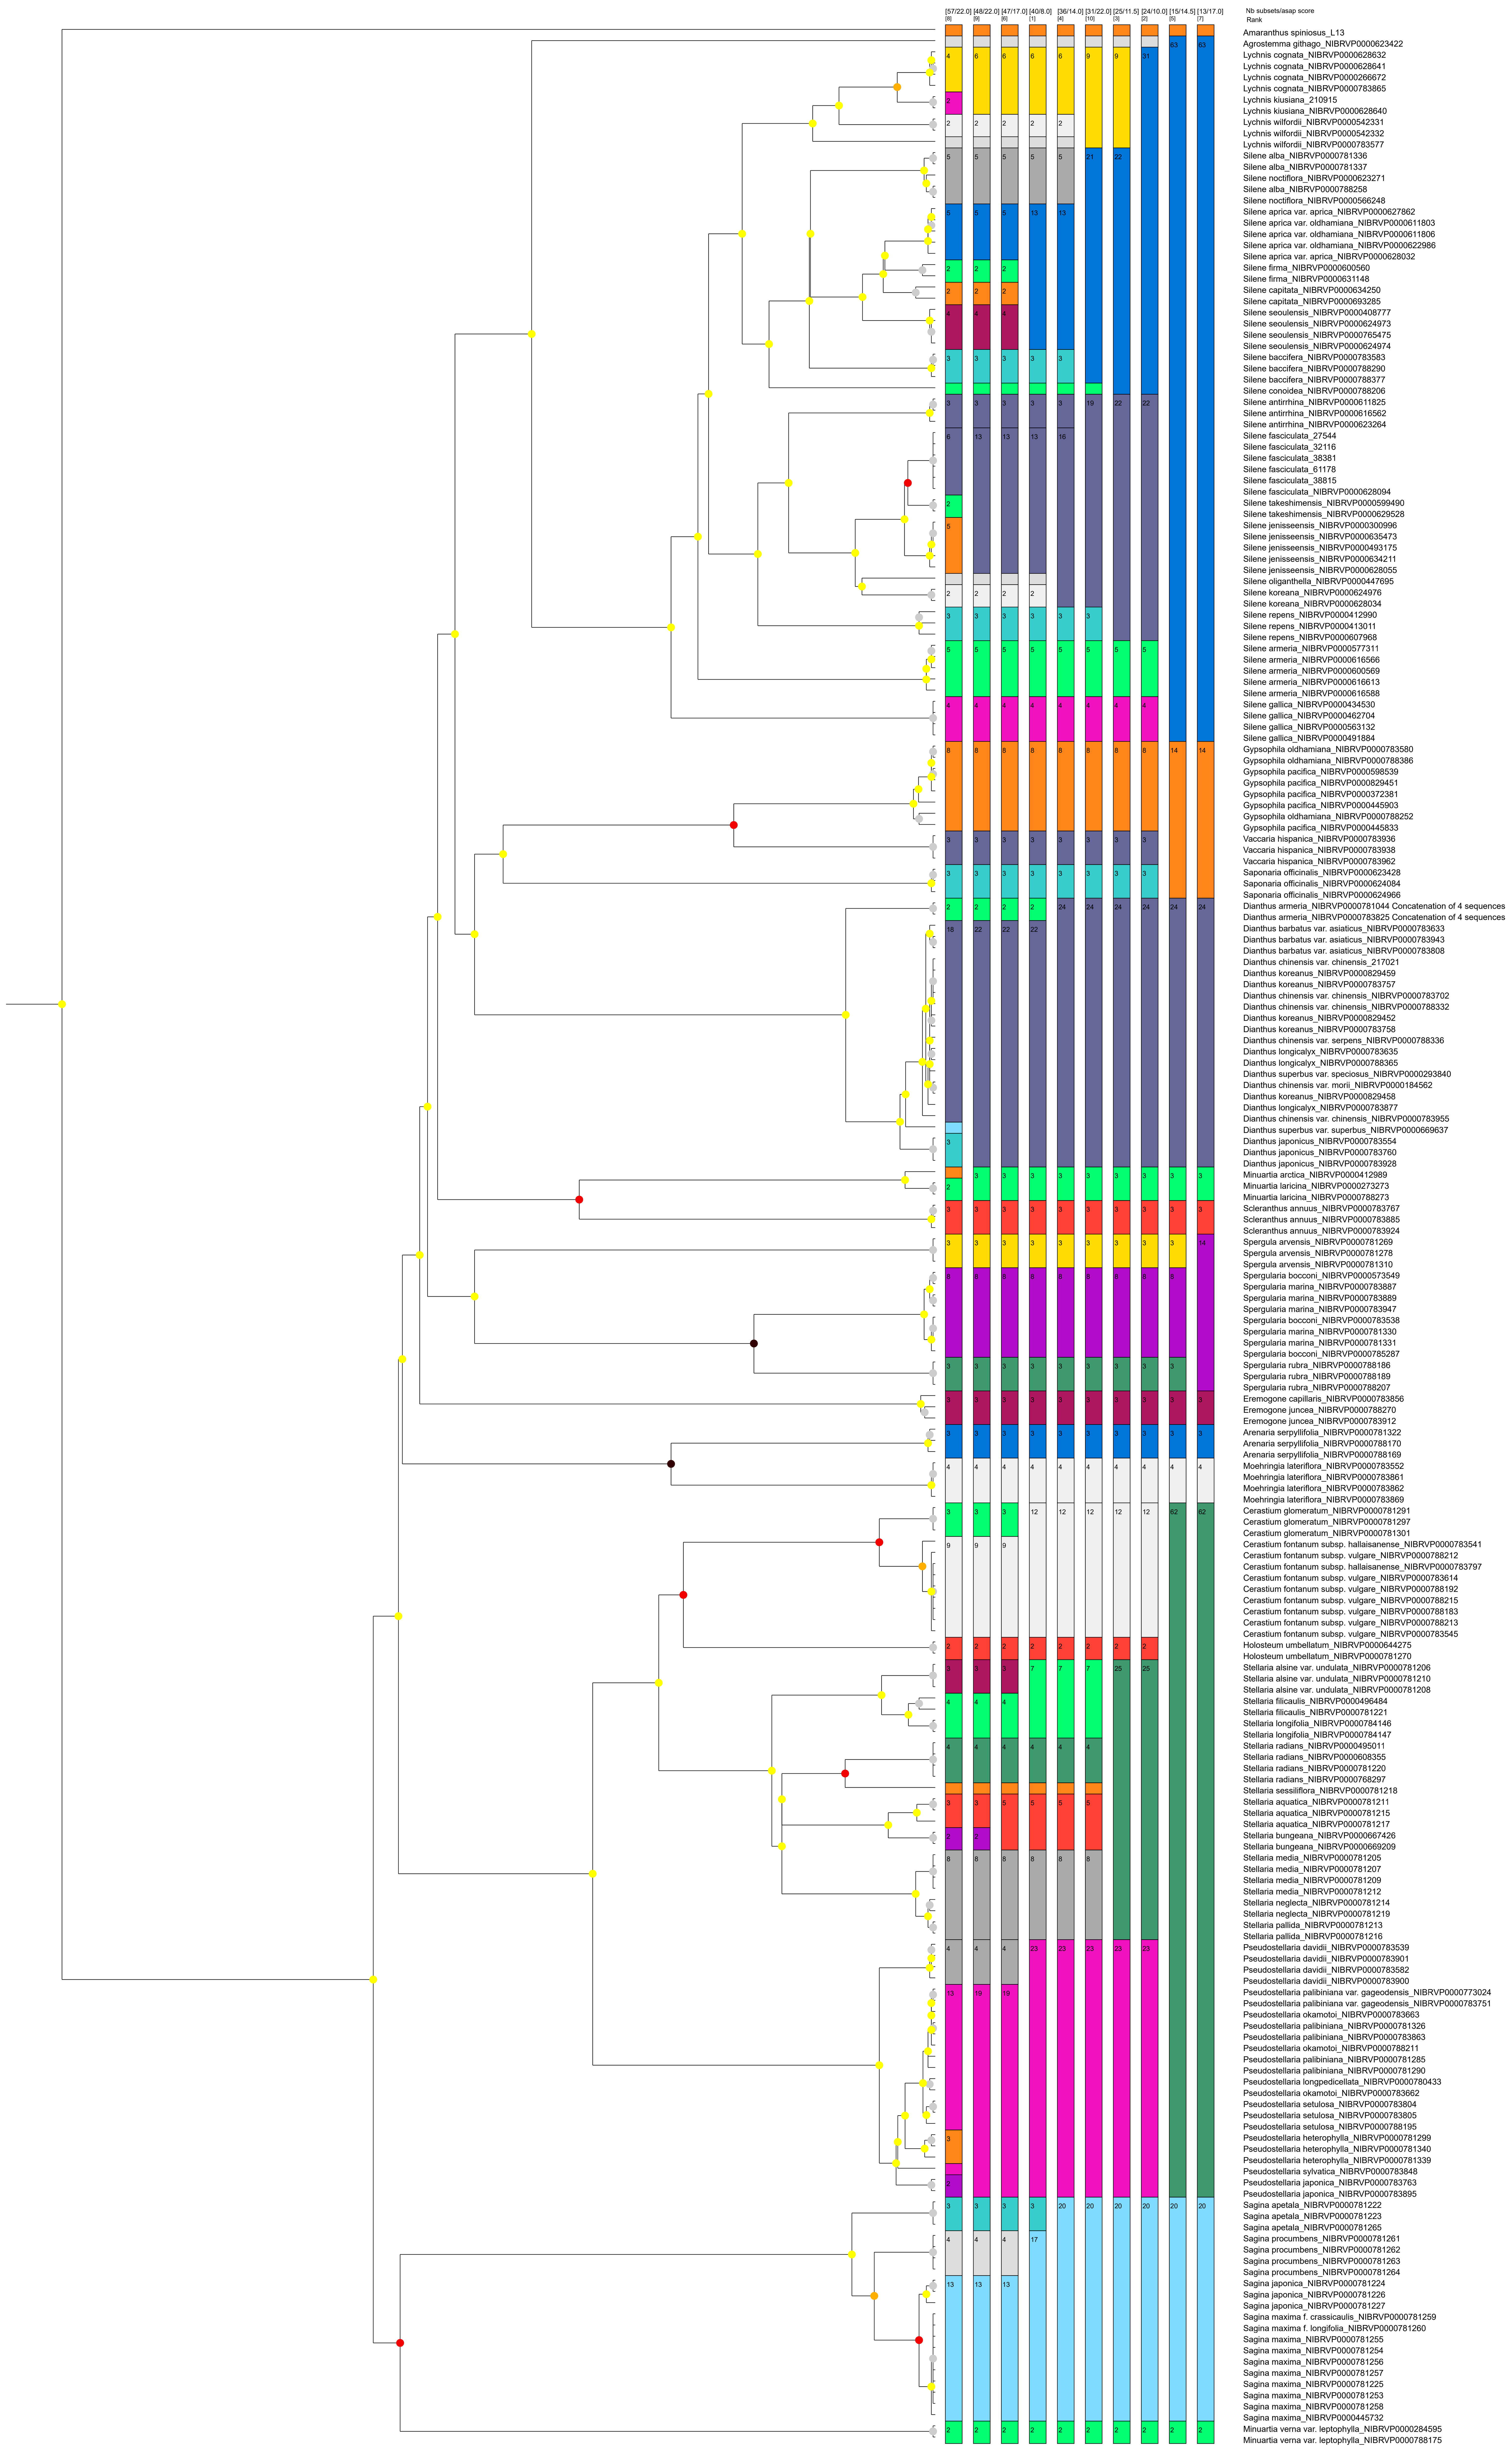



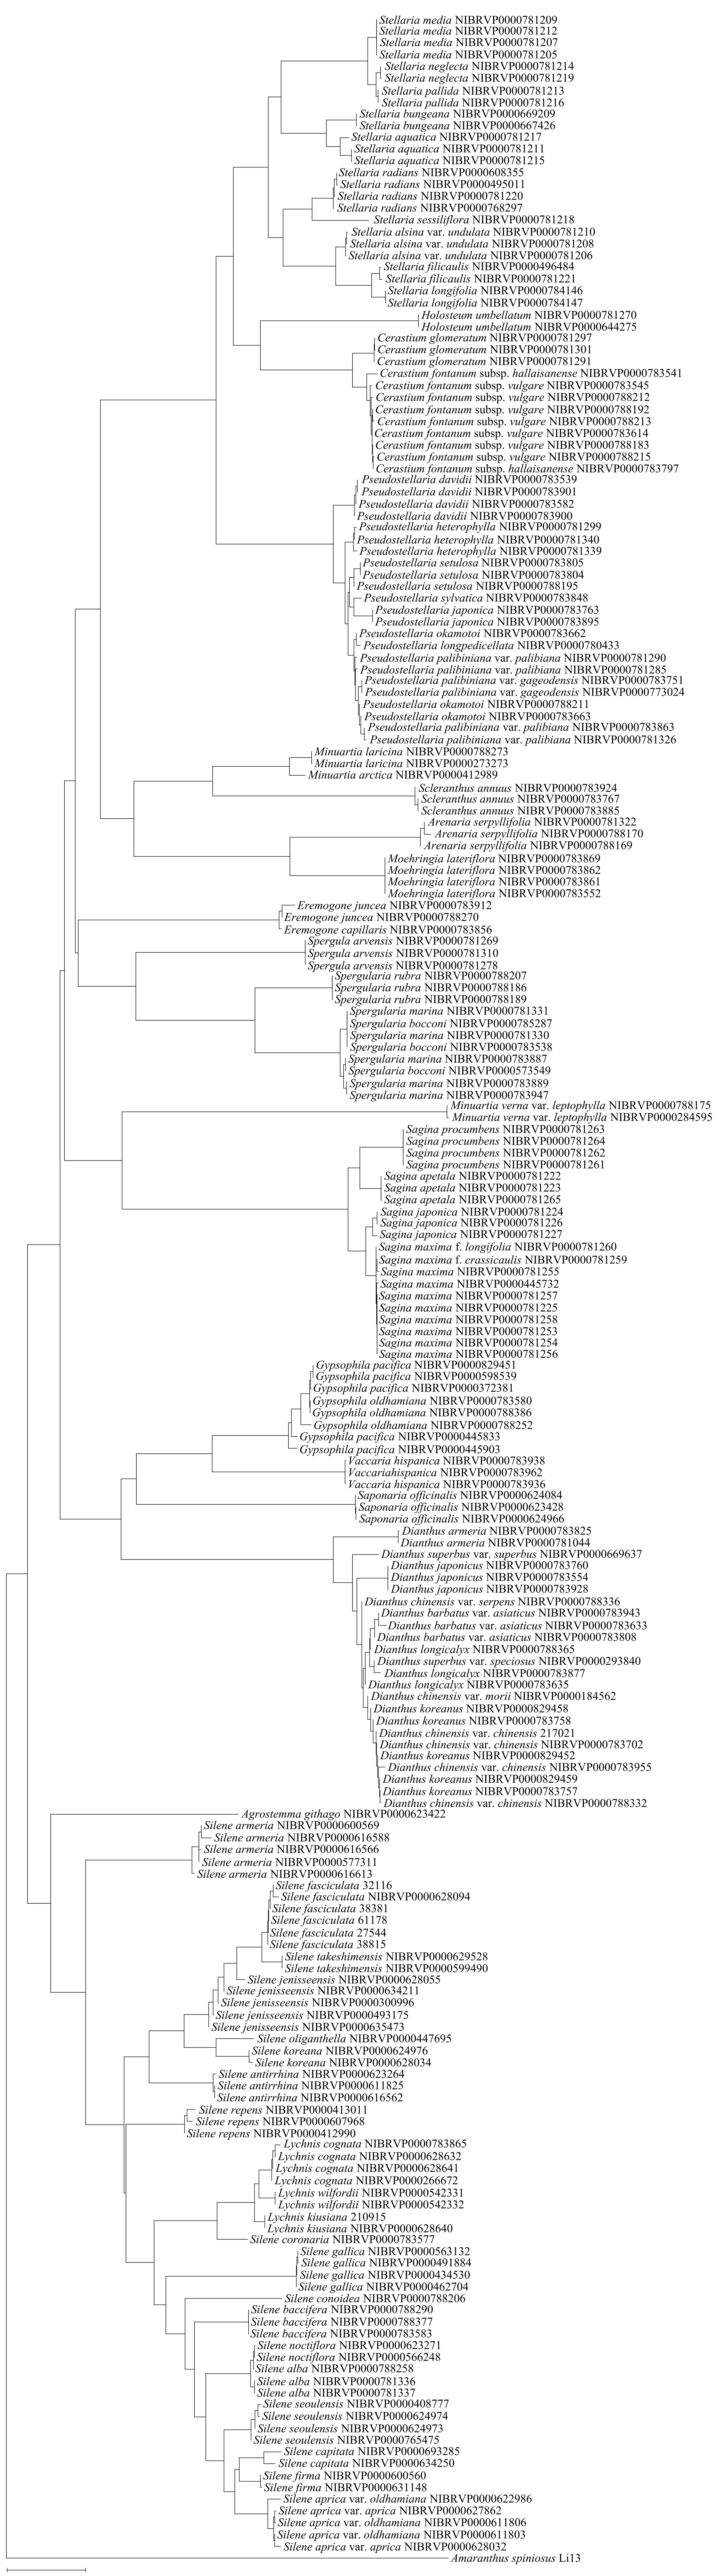

Supplement: s1 [file s1]
